# An inexpensive, high-precision, modular spherical treadmill setup optimized for *Drosophila* experiments

Frank Loesche <sup>1</sup> and Michael B. Reiser <sup>1,\*</sup>

## 1 ABSTRACT

2 To pursue a more mechanistic understanding of the neural control of behavior, many neuroethologists study  
3 animal behavior in controlled laboratory environments. One popular approach is to measure the movements  
4 of restrained animals while presenting controlled sensory stimulation. This approach is especially powerful  
5 when applied to genetic model organisms, such as *Drosophila melanogaster*, where modern genetic tools enable  
6 unprecedented access to the nervous system for activity monitoring or targeted manipulation. While there is a  
7 long history of measuring the behavior of body- and head-fixed insects walking on an air-supported ball, the  
8 methods typically require complex setups with many custom components. Here we present a compact, simplified  
9 setup for these experiments that achieves high-performance at low cost.

10 The simplified setup combines existing hardware and software solutions with new component designs. We  
11 replaced expensive optomechanical and custom machined components with off-the-shelf and 3D-printed parts.  
12 We built the system around an inexpensive camera that achieves 180 Hz imaging and use an inexpensive  
13 tablet computer for presenting view-angle-corrected stimuli updated through a local network. We quantify the  
14 performance of the integrated system and characterize the visually guided behavior of flies in response to a range  
15 of visual stimuli. The improved system is thoroughly documented. This publication is accompanied by CAD  
16 files, parts lists, source code, and step-by-step instructions for setting up the system and analyzing behavioral  
17 data. We detail a complete ~\$300 system, including a cold-anesthesia tethering stage, that is ideal for hands-on  
18 teaching laboratories. This represents a nearly 50-fold cost reduction as compared to a typical system used in  
19 research laboratories, yet is fully featured and yields excellent performance.

20 We report the current state of this system, which started with a one-day teaching lab for which we built seven  
21 parallel setups and continues towards a setup in our lab for larger-scale analysis of visual-motor behavior in  
22 flies. Because of the simplicity, compactness, and low cost of this system, we believe that high-performance  
23 measurements of tethered insect behavior should now be widely accessible and suitable for integration into many  
24 systems. This access enables broad opportunities for comparative work across labs, species, and behavioral  
25 paradigms.

26 **Keywords:** *Drosophila melanogaster*, optomotor response, tethered fly, walking behavior, sensorimotor behavior, open-source, open-  
27 hardware

---

\*<sup>1</sup>Janelia Research Campus, Howard Hughes Medical Institute, Ashburn, VA, USA

Correspondence\*: Michael Reiser <[reiser@m.janelia.hhmi.org](mailto:reiser@m.janelia.hhmi.org)>

# 1 INTRODUCTION.

28 The fly *Drosophila melanogaster* is a powerful model  
29 system for research in nearly all areas of organismal  
30 biology, and has been especially central to major  
31 discoveries in the development and function of the  
32 nervous system (Bellen et al., 2010). *Drosophila*  
33 have long been champion species for a wide range  
34 of behavioral experiments that are ideally suited to  
35 a controlled lab setting (Götz, 1964; Benzer, 1967;  
36 Heisenberg and Buchner, 1977). At the same time,  
37 the low cost, small size, wide availability, and ease of  
38 breeding have made flies ideal for use in educational  
39 and outreach settings, especially as the first or only  
40 hand-on introduction to genetics for many students  
41 (Harbottle et al., 2016). One important benefit  
42 of popularizing *Drosophila* methods for educational  
43 settings is that cutting-edge research can become  
44 directly relevant to the experience of the students.  
45 However, it is challenging to bring modern methods  
46 in animal behavior to teaching laboratories, since  
47 most setups developed for this purpose are built from  
48 custom components that are often quite expensive  
49 or difficult to obtain. Whereas just a few years ago,  
50 specialized components required custom machining or  
51 complex procurement, due to the surge of ‘desktop  
52 manufacturing’ and tools like 3D printers and laser  
53 cutters, together with increasing interest in citizen  
54 science and STEAM education, there is a push towards  
55 making complex laboratory setups widely accessible.  
56 Here we describe our efforts to optimize the cost and  
57 accessibility of a complete system for preparing and  
58 experimenting on flies using the preferred method in  
59 our laboratory — precise behavioral measurements  
60 for single, body-fixed (tethered) flies presented with  
61 controlled visual stimuli (Reiser and Dickinson, 2008;  
62 Dombeck and Reiser, 2012). From our prior experience,  
63 these experiments are a uniquely appealing entry point  
64 for teaching students about experimental neurobiology,  
65 for an introduction into laboratory instrumentation,  
66 and for hands-on exposure to quantitative animal  
67 behavior and the related opportunities for stimulus  
68 designs and data analyses. We hope that the low cost  
69 and accessibility of this system makes it suitable for  
70 a wide variety of laboratory settings, from summer

71 courses to undergraduate and even high-school teaching  
72 labs.

73 In what follows we describe the motivation and  
74 goals of the project, then detail all of the components  
75 of the system, characterize the performance of the  
76 integrated setup, demonstrate its performance in  
77 measuring rather sophisticated aspects of visually  
78 guided behavior in flies, and finally estimate the cost  
79 of our systems. While we favor a modular, adaptable  
80 approach to instrumentation, we have endeavored  
81 to simplify the described system, so we mainly  
82 detail one specific setup, but throughout we describe  
83 some alternative solutions that we considered. The  
84 manuscript describes the system that we have built  
85 and used for data collection between November 2020-  
86 March 2021, and is thoroughly documented at <https://reiserlab.github.io/Component-Designs/>. We  
87 expect to continue making improvements to this setup  
88 and will post updates to that repository.

## 90 1.1. Motivation and Approach.

91 The continual improvement of many commercial  
92 technologies comes as a direct result of massive,  
93 iterative efforts, by thousands of engineers, optimizing  
94 all aspects of the design of these products (consider  
95 that smart phones are not quite 15 years old). By  
96 comparison, even the most mature instruments used  
97 for collecting laboratory data are essentially bespoke  
98 prototypes benefiting from very few ‘generations’ of  
99 development. For that reason, many scientists prioritize  
100 designing their setups to combine high flexibility  
101 with precise control, which often requires using fairly  
102 expensive components capable of precision that far  
103 exceeds the requirements (often overestimated since  
104 never precisely specified) of any individual experiment.  
105 For the fly behavioral setup we have sought to  
106 optimize, we now benefit from several decades of  
107 methods development by many laboratories, which  
108 means we understand the requirements of this system  
109 rather well. Consequently, by eliminating unnecessary  
110 precision and flexibility, and taking advantage of  
111 desktop manufacturing tools, we could greatly simplify  
112 these setups and can now replicate them at much lower  
113 cost.

114 The setup we detail here was initially inspired by an  
115 invitation to run a hands-on training module at the  
116 *Drosophila* Neurobiology: Genes, Circuits & Behavior  
117 course at the Cold Spring Harbor Laboratory during  
118 the summer of 2019. We know that a front-of-class  
119 demonstration does not come close to the hands-on-  
120 experience of anesthetizing and tethering flies and then  
121 positioning them on a treadmill to observe walking  
122 behavior, but this requires many, independent setups.  
123 In preparation for the course, we began by attempting  
124 to replicate the typical (overly flexible and precise)  
125 walking fly-on-ball setups we favor in our lab, that  
126 are largely based on the systems we have previously  
127 described (Seelig et al., 2010; Strother et al., 2017). We  
128 focused on replacing the most expensive components,  
129 one-for-one, with less expensive commercial parts  
130 and some 3D printed components. At the time of  
131 the course we had converted a setup that would  
132 cost  $\sim$  \$16,000 to replicate, to one that could be  
133 built for  $<$ \$500. We assembled seven of these setups  
134 and succeeded in providing rigs to small groups of  
135 student who all learned to glue flies to pins and to  
136 position them on the treadmill. While this version was  
137 quite successful, we were unsure if it would simply  
138 be suitable for demonstrations, or whether it could  
139 fully replace our typical setups. In the past year we  
140 have continued to simplify and optimize the setup,  
141 with the goal of attempting to reproduce our gold-  
142 standard data set, the so-called optomotor response  
143 of walking flies (Götz and Wenking, 1973; Buchner,  
144 1976), with its well-studied dependence on the spatial  
145 and temporal properties of the visual pattern. Due  
146 to the COVID-19 pandemic we did not return to the  
147 course during the summers of 2020 or 2021, but have  
148 continued to refine the setup, so that we now have  
149 a complete, full-featured, low-cost implementation of  
150 both a fly preparation setup and the experimental  
151 setup, which is described below. Component designs,  
152 including those we plan to implement in the near  
153 future will be shared at <https://reiserlab.github.io/Component-Designs/>.

## 2 MATERIAL AND METHODS.

### 2.1. System Overview.

156 We detail the major components of our system for  
157 preparing (tethering) and measuring the walking  
158 behavior of flies. The components of the experimental  
159 setup are shown in Figure 1 a,b. A single fly is  
160 tethered to a rod, which is mounted on a manipulator  
161 allowing for precise positioning of the animal along the  
162 three translational axes (all components color-coded;  
163 manipulator in blue, Figure 1 a). The fly is positioned  
164 on top of an air-supported sphere, which serves as  
165 an omnidirectional treadmill (sphere holder in green).  
166 The temperature near the fly can be regulated via a  
167 heater below the ball holder (in purple); a thermistor  
168 attached to the holder provides the measurements for  
169 closed-loop control. Visual stimuli are displayed on a  
170 tablet computer (in gray) and rotations of the ball in  
171 response to fly walking are captured by the camera (in  
172 red). The ball is illuminated by three LED fixtures (in  
173 yellow). Figure 1 c shows signal flow for the system,  
174 including a computer that runs the software for ball  
175 tracking (FicTrac (Moore et al., 2014)) as well as  
176 FlyFlix, the software we developed to generate stimuli  
177 and log responses.

178 Gluing flies to a thin rod, a process referred to  
179 as *tethering*, can be straightforward, but requires  
180 a specialized setup that is not widely available or  
181 particularly well described in the literature. Therefore,  
182 we set out to simplify and document our solution  
183 here (Figure 2). A good tethering strategy must  
184 enable the precision required for positioning at the  
185 small scale of the fly body, as well as the mechanical  
186 robustness required to be manipulated by human hands.  
187 Essentially, a small fly needs to be carefully glued to  
188 an object that people can routinely move from one  
189 device to another. It is nearly impossible to tether a  
190 moving fly, and so flies must first be immobilized. While  
191 there are multiple ways to anesthetize flies, and CO<sub>2</sub> is  
192 commonly used, this gas is known to have many effects  
193 on behavior that can last for hours. Instead we favor  
194 chilling flies, which causes insects to enter a chill coma  
195 due to a transient failure of neuromuscular function,  
196 from which they rapidly recover (Findsen et al., 2014).

**a** System overview

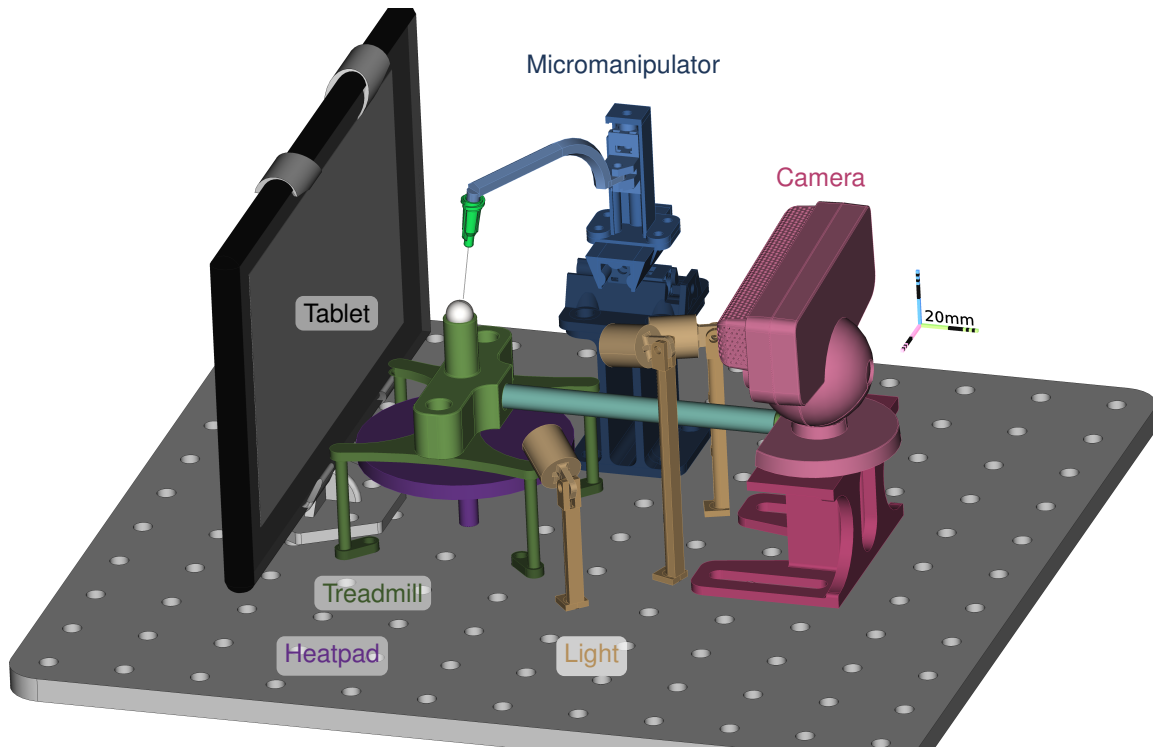

**b** Example setup

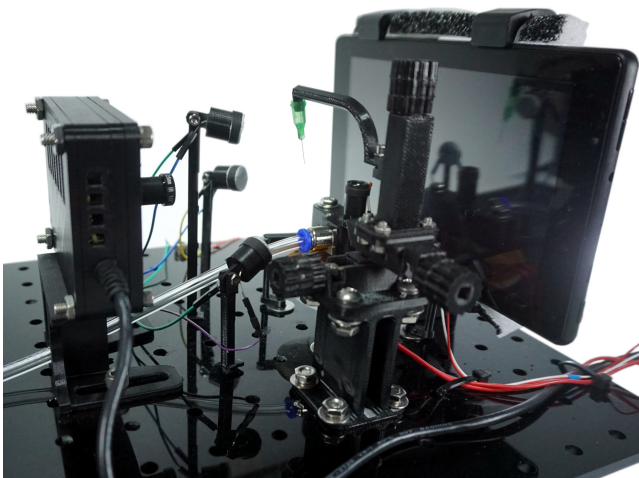

**c** System components and data flow

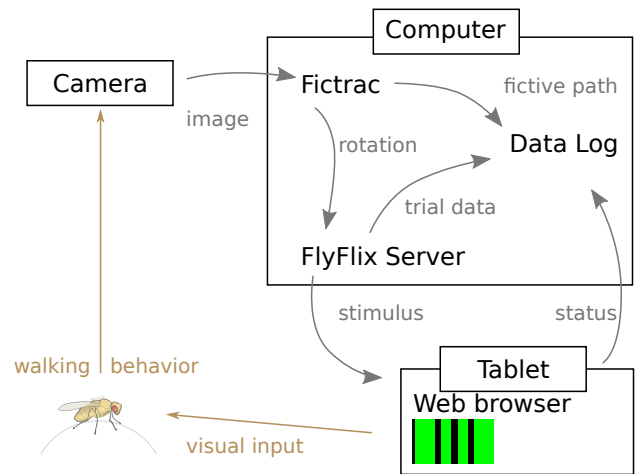

**Figure 1. Inexpensive treadmill setup for walking fly experiments.** The rendering in **a** highlights the major components. The fly is tethered to a thin syringe tip (light-green cone) and positioned and held in place with the micromanipulator (in blue) facing the tablet (gray) while walking on the treadmill sphere (in white). The treadmill holder (in green) floats the sphere on a steady stream of air supplied by the (light blue) tubing that pointing towards the camera (in red) used to track the sphere rotations. Adjustable lights (in yellow) illuminate the sphere. The temperature near the fly is controlled from below by the heatpad (in purple). All components are mounted on a breadboard laser-cut from an acrylic plate. **(b)** A photograph of the setup in the lab. **(c)** The flow of information between the major functional modules. For closed-loop experiments, ball rotations from FicTrac are routed to FlyFlix for on-line stimulus updates.

197 When chilled to temperatures close to freezing (Gibert  
198 and Huey, 2001), flies rapidly immobilize.

199 We place vials of flies directly into an ice bucket  
200 for 5 min (not shown). We then transfer the immobile  
201 flies to a cold, temperature-controlled platform, the  
202 'Chiller' in Figure 2a. We tap out a small number  
203 (<5) of flies onto the sorting platform on the upper  
204 part of the red structure in Figure 2a. We use the fly  
205 picker (Figure 2e) to gently pick up (using suction) a  
206 selected fly (usually a large female) and deposit the  
207 fly into one of the semi-cylindrical indentations in the  
208 lower part of the platform (see Figure 2 a, c, d). On  
209 occasion it is possible to perfectly position a fly into  
210 this 'sarcophagus,' but typically the flies need to be  
211 aligned using a paintbrush before a small drop of glue  
212 is placed (with a fine wire, see Figure S5) towards the  
213 anterior side of fly's notum, the dorsal surface of the  
214 thorax. We have designed a hand rest to support the  
215 user's arm during these fine-scale manual steps (see  
216 Figure S4). We then use the three-axis linear stage  
217 Figure 2a,b to position the tether so as to just make  
218 contact with the glue. We use glue that rapidly cures  
219 upon illumination with short wavelength (ultraviolet,  
220 UV) light. Once cured, the fly can be lifted out of the  
221 sarcophagus and is ready to be used in experiments  
222 within a few minutes (Figure 2d).

223 We describe the construction of the tethering station  
224 in Section 2.2 and the experimental setup in Section 2.3.  
225 In Section 2.4 we detail how we used these components  
226 to run experiments.

## 227 **2.2. Tethering station.**

228 For maximal user convenience, we recommend that  
229 the tethering station be physically separated from the  
230 experimental rig (as in Figure 2) and positioned under  
231 a dissecting microscope. However, even further cost and  
232 space reduction are possible if the tethering station and  
233 experimental setup are integrated into one unit (see  
234 Figure S3), making use of a single micromanipulator  
235 for both.

### 236 *2.2.1. Magnification.*

237 In our experience, every student can learn to prepare  
238 excellent flies for behavioral experiments with only

239 a few sessions of practice. However, better results  
240 require learning to position flies so they are glued with  
241 approximate symmetry—in the center of the anterior  
242 notum and with minimal body rotation about the roll  
243 and yaw axes, and with the tether glued at 90° to the  
244 body long axis. This precision requires magnification.  
245 In our current setup, we position the tethering stage  
246 below a salvaged stereo microscope (Zeiss STEMI  
247 SV8). We have confirmed that flies can be tethered  
248 with alternative magnification methods such as a low-  
249 cost 'toy' USB microscope and a magnifying glass  
250 typically used for soldering electronics, however neither  
251 is as practical as a stereo microscope. In particular,  
252 we find that the instantaneous feedback of an all-  
253 optical system is ideal for mastering the hand-eye  
254 coordination required, while the delays in the low-cost  
255 digital microscope were quite challenging to work with.  
256 We recommend a stereo microscope with magnification  
257 of at least 10X (although 30X is even better) that can  
258 be lifted to support the height of the tethering station,  
259 which requires clearance of at least 170 mm.

### 260 *2.2.2. Tether.*

261 The tether provides the critical interface between  
262 the humans-scale and the fly-scale. We base the  
263 tethers in our laboratory on the original three-part  
264 design of Michael Dickinson (Lehmann and Dickinson,  
265 1997). These parts are a connector, a 0.1 mm  
266 diameter tungsten rod (that gets glued to the fly),  
267 and hypodermic tubing to connect the two parts.  
268 The rod and tubing are typically sold in longer units  
269 and need to be cut to length before the three parts  
270 can be assembled, and we require a special setup  
271 to assemble these components reliably. Also, the  
272 tethers can be easily bent and require regular repairs  
273 and replacement. Because of the laborious assembly,  
274 and other limitations of this design, we tested many  
275 alternative options that would be well suited to the  
276 needs of a teaching course.

277 In our walking setup, we obtained excellent  
278 results using unmodified blunt-tip dispensing needles.  
279 Dispensing needles with Luer adapters are widely  
280 available, manufactured to tight tolerances, inexpensive,  
281 and easy to handle. We selected 34 ga needles, featuring  
282 a stainless steel tube an outer diameter of 0.25 mm

283 and 0.5 in (about 12.5 mm) in length. This is the finest  
284 needle size that is readily available from many vendors  
285 (e.g. AG-ABSS-99D0, Bstean, China). Due to this  
286 fine size, these dispensing needles are also suited for  
287 tethered flight experiments, but are easily bent and  
288 should be handled with some care. We use the inner  
289 sloped cone of the Luer lock to friction mount the  
290 tethers to our setup. We designed mount points on  
291 the arms of the Micromanipulator in the preparatory  
292 and experimental setup (Figure 2b). It is convenient  
293 to tether a number of flies one after the other and hold  
294 them until experiments are carried out (see Figure S5 i).  
295 We hold flies on a strip of upward facing screws (M4  
296 or 8-32 will work) glued to a surface. We note that  
297 the Luer adapter is keyed with a pair of plastic tabs  
298 that can be used for alignment. We only use these  
299 as a visual aid, but this feature could facilitate more  
300 automated alignment in future setups.

### 301 2.2.3. Glue and curing.

302 To fix the tether to the fly thorax, we use resins that  
303 polymerize upon intense illumination, conveniently  
304 converting from liquid to solid within seconds. The  
305 standard glue used in our lab is KOA 300 (Kemxert,  
306 Poly-Lite, York, PA, USA), that requires UV (320 nm–  
307 380 nm) light to cure. We typically use a commercial  
308 spot-curing lamp, such as the SpotCure-B (Kinetic  
309 Instruments Inc., Bethel, CT, USA), as they supply  
310 high intensity illumination (that cures the resin within  
311 seconds) and feature a convenient, audible timer that  
312 allows us to achieve consistent curing. Throughout  
313 the development of our setup, we tested different glue  
314 products and have confirmed that Bondic UV liquid  
315 plastic (Bondic USA, Niagara Falls, NY, USA) and  
316 Solarez Fly Tie UV Cure (Solarez Wahoo International,  
317 Vista, CA, USA), which are both widely available, work  
318 well as the tethering glue. We have a slight preference  
319 for the viscosity of the KOA 300 glue. Bondic and the  
320 Solarez thick formula appeared to be more viscous,  
321 while the Solarez flex formula (green package) is quite  
322 similar to KOA 300. The cost differences between these  
323 options are not significant, and we used KOA 300 in  
324 our experiments.

325 For teaching lab applications, we have used  
326 inexpensive UV-LED mini flashlights (basically a

327 CR2032 battery with a single UV-LED) to cure  
328 KOA 300. Bondic and Solarez are available in packages  
329 with battery-operated curing lights that work well for  
330 our application. In the near future, we plan to integrate  
331 automatically timed UV curing lights into the tethering  
332 setup.

### 333 2.2.4. Cooling.

334 When cooled below 4°C *Drosophila* are rapidly and  
335 reversibly immobilized (Gibert and Huey, 2001), which  
336 makes it convenient to align and tether the flies, and  
337 also to perform further surgeries and treatments if  
338 desired. While the flies can be chilled on a metal  
339 stage mounted on ice (or a frozen gel ice pack), a  
340 temperature-controlled thermoelectric cooler provides  
341 a more compact and stable solution. Using the Peltier  
342 effect, a powered thermoelectric cooler moves heat from  
343 one side of the device to the other, but to cool one side  
344 stably below room temperature, heat from the hot side  
345 must be effectively carried away. In our lab, we use a  
346 recirculating water chiller to pump water through a  
347 liquid-cooled Peltier assembly. This is quite reliable,  
348 but is expensive and cumbersome (substantial tubing  
349 is required), and occasionally very messy.

350 For our optimized setup we use an integrated,  
351 low-cost, air-cooled Peltier assembly that consists  
352 of a 40 mm × 40 mm thermoelectric module mounted  
353 between a 40 mm × 60 mm aluminum plate and a  
354 90 mm × 90 mm aluminum heat sink with a fan  
355 (Adafruit Industries). We find that when powered with  
356 a 12 V 6 A supply, the top aluminum plate reaches  
357 temperatures below 0°C while operating under typical  
358 ambient room temperatures. This confirms that the  
359 device can adequately cool flies. In order to provide a  
360 consistent temperature above freezing, we implemented  
361 closed-loop temperature control using a W1209 module  
362 (multiple vendors, e.g. MOD-78, ProtoSupplies, Lake  
363 Stevens, WA, USA) that can regulate an electric load  
364 up to 10 A based on input from a 10 kΩ NTC thermistor  
365 attached to the top side of the chiller's aluminum  
366 plate (see Figure 2 d). We mount the chiller at 20°  
367 towards the experimenter, shown in Figure 2 a. This  
368 angle provides good airflow for cooling the module,  
369 while pushing air away from the experimenter so  
370 as not to blow flies off of the tethering station. By

371 pitching the platform we ensure that flies will always  
372 be visible from above while being inspected, aligned,  
373 and tethered (both the fly and tip of the tether are seen  
374 throughout). For the simplest setup, we angled the  
375 chiller by extending two screws at the corners of the  
376 fan attached to the heat sink (see Figure S3). Instead,  
377 the integrated setup shown in Figure 2a is assembled  
378 from laser-cut acrylic sheets. This design also includes  
379 mounting holes for the micromanipulator and a hand  
380 rest (CAD files in the accompanying repository).

### 381 2.2.5. *Sarcophagus*.

382 To position, hold, and sometimes dissect or manipulate  
383 cold-anaesthetised flies during tethering, we typically  
384 use a movable cylindrical cavity machined from solid  
385 brass. This design is affectionately referred to as a  
386 *sarcophagus* and based on the original design of Karl  
387 Götze (Max Planck Institute for Biological Cybernetics)  
388 from the 1960s. The most important feature of the  
389 cavity is that it should be smooth and slightly larger  
390 than a fly, since fly legs can be easily caught on  
391 sharp edges. Beyond this detail, many aspects of the  
392 elaborate Götze design are not required for routine  
393 tethering of flies for walking experiments. For the  
394 optimized tethering stage, we tested various 3D-printed  
395 sarcophagus components. We find that parts printed  
396 from different materials, including resin, ABS, and  
397 TPA, all worked similarly well.

398 The example plate in Figure 2a,d is made from  
399 red ABS. 3D printing allowed us to place cavities  
400 of different sizes on a single plate, to accommodate  
401 experimenter preference for size and depth, as well  
402 as to readily support tethering insects of differing  
403 sizes. We designed an inclined sorting area on the  
404 top section of the plate, such that different regions  
405 are made of different depth of material, creating  
406 different temperature zones. We sanded the bottom  
407 side of the sarcophagus plate and mounted it to the  
408 aluminum plate of the chiller with thermal adhesive  
409 tape. We find that setting the Chiller to a nominal  
410 temperature of 2°C works well for our setup. Flies  
411 remained immobilized while on the plate, but started  
412 moving within seconds off the plate. The temperature  
413 setting may need to be adjusted for different setups.

### 414 2.2.6. *Micromanipulator*.

415 For precisely and stably positioning the tether near  
416 the fly for gluing, we typically use industrial-grade  
417 three-axis linear stages with a probe-clamp (from  
418 Thorlabs or Siskiyou). Because these devices are used  
419 for microscopic manipulation, they are referred to as  
420 *micromanipulators*. We use a second micromanipulator  
421 to position and then hold the fly on the treadmill of the  
422 experimental setup. These manipulators are essential  
423 components of reliable setups, but the commercial  
424 components we use are too expensive (\$500 or more)  
425 for the purposes of a teaching course. In exploring  
426 alternative manipulators, we tested lower-cost, three-  
427 axis manipulators ( \$100, e.g. LD40-LM, multiple  
428 manufactures available through Aliexpress, China) and  
429 find them to be a suitable replacement for linear stages  
430 from lab suppliers (see Figure S4). However, we were  
431 interested in exploring even lower cost options, and  
432 evaluated several 3D-printed alternatives, including the  
433 micromanipulator design from Open Labware (Baden  
434 et al., 2015; Chagas et al., 2017). We find this design  
435 to be quite workable, but the footprint was somewhat  
436 challenging to incorporate into our setup. Based on  
437 these explorations, we proceeded to design our own  
438 micromanipulator, optimized for simplicity and cost,  
439 and with a compact footprint.

440 Our three-axis micromanipulator design (Figure 2b)  
441 is assembled from nine 3D-printed parts and standard  
442 screws. For each axis, an outer rail surrounds the  
443 carriage on three sides. Each rail features a screw held  
444 in place by a locking nut (red in Figure 2b). Turning  
445 each yellow knob with the attached red screw moves  
446 the corresponding green nut, and with it the carriage.  
447 The arrangement of the three axes allows translational  
448 movement in any direction by up to 20 mm. We printed  
449 the parts from ABS on a F-170 (Stratasys Ltd, Eden  
450 Prairie, MN, USA). This design requires slightly tighter  
451 tolerances than can be relied on from the printer, so we  
452 sanded and smoothed the outer faces of the carriages  
453 with 200 grit sanding paper until they would slide  
454 into the rail. The rails did not require post-processing.  
455 Even though this sanding can take up to 30 min, we  
456 find this advantageous as it allows us to produce a  
457 close fit across material and printers, and thus high

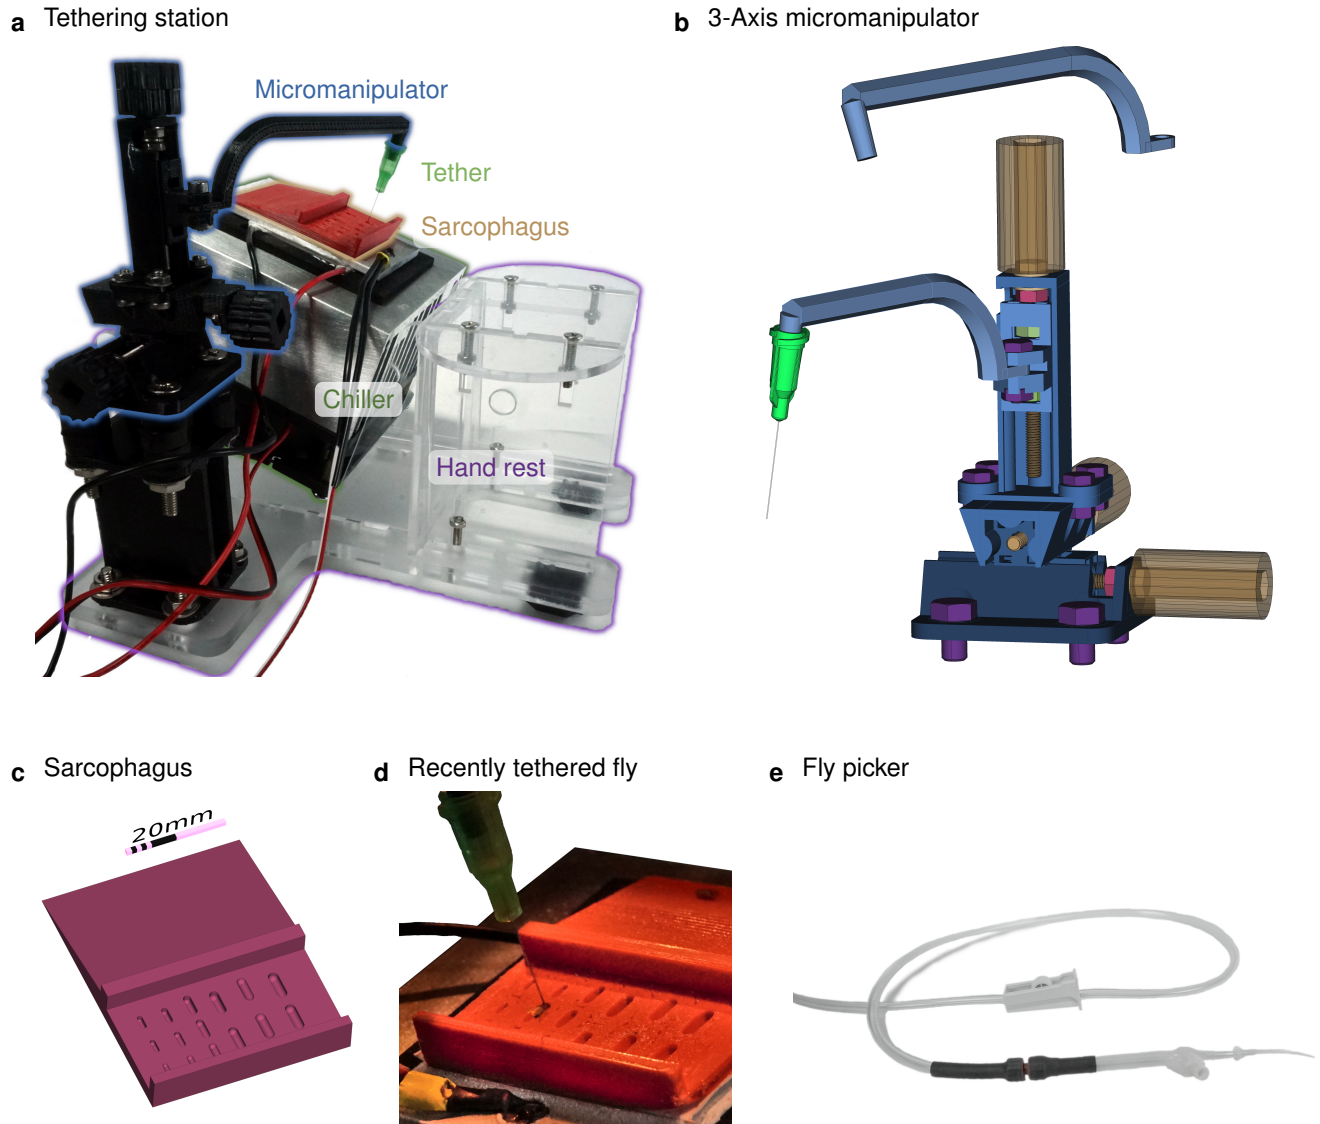

**Figure 2. Chilled tethering station for preparing flies.** (a) The major components highlighted in this photograph of the tethering station: micromanipulator (in black), sarcophagus (in red), Peltier-based chiller with heat-sink (silver and black), and a transparent laser-cut fixture with a hand rest. This setup is typically used under a dissecting microscope, and a thermistor is used to measure the top surface of the chiller for closed-loop temperature control. (b) A compact, 3-axis micromanipulator fabricated from 3D-printed parts and simple hardware components. Two different arms are used, one for the tethering station and the other for the experimental rig. For each axis, the rotating handle and screw are color-coded in yellow, the location of the screw is fixed in the outer rail via the red locking nut, and the green nuts within each carriage transfer the liner motion. The device is held together and mounted using the purple screws (c) A rendering of the sorting and mounting plate, containing a series of indentation, each referred to as a *sarcophagus*, of different dimensions for different animal sizes. Cold-immobilized flies are sorted on the top section of the plate, and single flies are positioned in one of the cavities for gluing to the tether. (d) A photograph of the plate mounted on top of the chiller with a temperature sensor (yellow tape) and a fly glued to the tether (a dispensing needle). (e) The fly picker used to move anesthetized flies. The picker uses suction controlled by the operator's finger to pick up and deposit single flies.



458 accuracy movement, without adapting the design. We  
459 also recommend applying a plastic lubricant to the rails  
460 (e.g. Dry-Film Lube, WD-40, San Diego, CA, USA)  
461 to increase smoothness of movement. 3D printed (or  
462 laser cut) knobs are glued to the screw heads to allow  
463 comfortable handling of the micro manipulator. The  
464 bottom rail has additional mounting holes to attach  
465 the manipulator securely to the baseplate.

466 We have designed two arms for mounting to the z-  
467 axis carriage, shown in Figure 2 b. The floating arm is  
468 used for tethering flies, is slightly longer, and holds the  
469 tether (by a friction fit) at 20° inclined from vertical,  
470 to match the angle at which the heat sink is mounted.  
471 The arm shown as fixed to carriage holds the tether at  
472 a 10° angle in the opposite direction, and is used for the  
473 experimental setup. The orientation and function of the  
474 arms can be rapidly adapted to specific applications.  
475 The micromanipulator assembled from 3D printed  
476 parts is a low-cost functional substitute, but it does not  
477 replicate the properties of a commercial linear stage. In  
478 particular, the plastic parts are somewhat compliant and  
479 cannot be used with heavy loads.

#### 480 2.2.7. Fly picker.

481 Single flies need to be moved and carefully positioned  
482 on the tethering platform. It is possible to do this  
483 with forceps, but we do not recommend picking up  
484 flies destined for behavioral experiments by either their  
485 legs or wings. In our laboratory we use a commercial  
486 vacuum pump and wand with a very fine tip that is  
487 typically used for handling tiny electronic components  
488 during assembly. With such a device it is possible to  
489 very gently lift a fly and quickly deposit them into the  
490 sarcophagus in nearly the ideal position for tethering.  
491 One alternative would be to fit a standard lab aspirator  
492 (or pooter) to use a fine tip. However, we find the  
493 hand-held vacuum approach to be rather convenient  
494 and so we have fashioned a version from standard  
495 components (Figure 2 e). We use a plastic transfer  
496 pipette with the bulb end cut off and replaced by a  
497 tubing connector (we used Luer locks connectors, but  
498 any tight connection would work). This connection  
499 is further strengthened with heat shrink tubing. We  
500 connect the tubing to our available lab vacuum, but  
501 this can be replaced by suction pumps or other sources

502 of negative pressure (Baden et al., 2015). We control  
503 the the suction from the picker by a roller clamp on  
504 the tubing. We cut a hole in the side of the pipette  
505 and glued in another adapter with a flat surface. When  
506 covering this stub with a finger, the suction at the tip  
507 substantially increases. When the finger is removed,  
508 the fly is released. Since the opening at the tip of the  
509 transfer pipette is too wide for a *Drosophila*, we added a  
510 one-way tip (F1732011 Pipetman Expert Tips EL10ST,  
511 Gilson, Middleton, WI, USA) as in Figure 2 h or piece  
512 of thin heat shrinking tube in Figure S5 g. By bending  
513 a paper-clip to a desired angle and using a heat gun on  
514 the shrink tube and plastic pipette tip, we bent the tip  
515 in an angle that allowed more convenient use. We find  
516 that the pipette tip with an inner diameter of 0.25 mm  
517 and an outer diameter of 0.65 mm allows for convenient  
518 manipulation of flies. Flies are incredibly robust, but  
519 we recommend adjusting the pressure (via the clamp)  
520 to just above the threshold for reliably lifting flies.

### 521 2.3. Experimental Setup.

522 Here we detail the major components already  
523 introduced for the walking fly on a ball setup shown  
524 in Figure 1 .

#### 525 2.3.1. Baseplate.

526 Many lab setups are built on solid aluminium  
527 breadboards with threaded mounting holes from  
528 specialized lab equipment manufacturers. They are  
529 very stable and can be flexibly used for many  
530 purposes. In place of these boards we use a  
531 300 mm × 300 mm × 10 mm acrylic board into which  
532 we cut 144 holes of 6.35 mm diameter in a 12 x 12  
533 grid with 1 in (2.54 mm) spacing using a laser cutter.  
534 To further simplify the design, we opted not to tap  
535 threads into the holes. Several components, such as  
536 our LED lamps, can be flexibly positioned using a  
537 friction fit. Parts that require stable fixation can be  
538 mounted with nuts and screws. We use adhesive rubber  
539 feet at the corners to lift the baseplate and add some  
540 vibration damping. This baseplate could be further  
541 simplified to the minimal size and number of mounting  
542 holes required to fit the components in the setup, but  
543 the additional holes allow for future extensions to the

544 apparatus. This simple design is both light and stable,  
545 ideal for carrying to teaching labs and outreach events.

### 546 2.3.2. Micromanipulator.

547 To walk with a typical gait the fly needs to be  
548 positioned  $\sim 0.4$  mm from the surface of the sphere,  
549 and aligned to the center of the ball (see Figure S5j).  
550 We use the identical micromanipulator, of our own  
551 design, described in section 2.2.6, with the arm that  
552 positions a fly so they are walking at  $10^\circ$ , or slightly  
553 ‘uphill’ – based on observations made in our lab, which  
554 appears to improve walking performance (personal  
555 communication, Shiuan-Tze Wu). The tether is friction  
556 mounted onto the arm and can be gently rotated so as  
557 to manually align the long axis of the fly towards the  
558 screen.

### 559 2.3.3. Treadmill.

560 The omnidirectional treadmill consists of a stem  
561 that holds an air-supported sphere. Our simplified,  
562 3D printed design for the sphere holder is a direct  
563 adaptation of the design from Seelig et al. (2010), which  
564 was custom-machined out of aluminum. The original  
565 design made use of a straight inner shaft for airflow  
566 to simplify the machining process, but this limitation  
567 does not apply to 3D printing. We implemented a more  
568 compact design where air enters via tubing with a  $90^\circ$   
569 angle to the sphere-supporting air column, as shown  
570 in Figure 1 a,b. In addition, we provide CAD files for  
571 alternative designs, including for different ball sizes, in  
572 the accompanying repository.

573 While some 3D printing methods will produce a  
574 solid, airtight part, most printers that build up parts  
575 by fusing filament in layers may result in parts that are  
576 not airtight and will allow air to escape. Rather than  
577 require specific printing methods, we find that quite  
578 satisfactory performance can be achieved with simple  
579 post-processing. Applying acetone to the surface of the  
580 printed part seals the holes. We find that sealing only  
581 the outer surface works well, while applying solvents  
582 to the thin inner tubing could result in clogging the  
583 air stream (which can be drilled out).

584 The flow-rate of the air needs to be controlled:  
585 if too low, the ball won’t reliably float, and if too

586 high, the ball will be much less stable (or fly off).  
587 In the fly-on-ball setup of Seelig et al. (2010), the  
588 airflow is fed by pressurized air which is regulated  
589 by a commercial mass flow controller. We find that  
590 with no loss of performance an inexpensive flowmeter  
591 can be used instead, but it is important to select one  
592 that allows fine control over the appropriate range of  
593 airflow. For example, VFA-22 (Dwyer, Michigan City,  
594 IN, USA) with a maximum of  $1 \text{ L min}^{-1}$  works well. In  
595 practice, we adjust the flow rate by visually inspecting  
596 a walking fly on the ball. In place of a pressurized air  
597 supply, we have tested an aquarium-style air pump  
598 with a maximum flow rate of  $1.8 \text{ L min}^{-1}$ . We find that  
599 inexpensive pumps induce some vibrations in the ball  
600 and are continuing to investigate the ideal substitute  
601 for wall-supplied pressurized air.

### 602 2.3.4. Spheres.

603 The sphere of the treadmill is the only moving part  
604 during the walking experiment and is therefore crucial  
605 for good measurements of behavior. The sphere needs  
606 to be nearly perfect in shape but not too smooth,  
607 light enough to float and be spun by the fly, but  
608 not so light that flies can pick it up, and with  
609 low rotational inertia to enable mostly unrestricted  
610 walking by flies. We have tested many alternatives,  
611 but our preferred standard sphere is still based on  
612 the method of Seelig et al. (2010), where the spheres  
613 are cut from foam with either a file (design available  
614 at <https://wiki.janelia.org/wiki/display/flyfizz>) or by  
615 a CNC machine. We find that flies walk best on  
616 a sphere cut from Last-A-Foam FR-7120 (General  
617 Plastics Manufacturing Company, Tacoma, WA, USA)  
618 to a diameter of 9 mm (density of  $320 \text{ kg m}^{-3}$ , sphere  
619 weighs approx. 0.12 g). For optical tracking of the  
620 sphere rotation with FicTrac (Moore et al., 2014),  
621 we paint this NIR-reflective foam with BLK3.0 paint  
622 (Stuart Semple studio, Dorset, UK), which we find to  
623 be less NIR-reflective than a black permanent marker,  
624 and thus produces high contrast features. We continue  
625 to test alternative sphere materials that will be more  
626 readily available than a hand-filed foam ball. The  
627 results will be documented in the accompanying project  
628 repository.

### 2.3.5. Sphere tracking camera.

In tethered walking experiments the flies are fixed in space, however their intended locomotion, as if walking on an infinite virtual plane, can be estimated through the rotation of the sphere they are turning. Several methods have been developed for measuring relative rotations of the ball, for example through optical mice sensors or via optical flow calculated with camera-based systems (Lott et al., 2007; Seelig et al., 2010; Vishniakou et al., 2019). Under ideal circumstances, these relative measurements can be calibrated for excellent accuracy, but these systems can be quite sensitive to the uniformity of the lighting and focus of the sensors, etc. By estimating the absolute position of the sphere in every frame, the tracking software FicTrac (Moore et al., 2014) is an exciting alternative approach that offers several advantages.

To use FicTrac, the sphere must be painted with a high-contrast pattern that looks unique at any position. FicTrac then maps individual camera frames to a previously constructed template of the sphere's pattern to estimate the instantaneous rotation of the sphere. The animal's virtual trajectory can be reconstructed from the frame-by-frame estimates of the sphere's position. The software works best with sharp edges and high contrast, so Moore et al. (2014) suggest to avoid motion blur, by imaging with high frame rates. FicTrac supports industrial cameras from Flir and Basler, as well as images through OpenCV (<https://opencv.org/>), a library for real-time machine vision with extensive support for a variety of cameras. As FicTrac operates on a high-contrast single color channel image, downsampled to a resolution of 60 px × 60 px, we realize that the ideal low-cost camera for this application should support a low-resolution, high frame rate mode (a combination of requirements that are nearly the opposite of most inexpensive camera sensors). We found that the PlayStation Eye camera (Sony Entertainment Corp.), developed as an input controller for action games, is an excellent solution. Using open-source drivers for the low-latency integrated video processor, we obtain access to a stable video stream of 187 fps at a resolution of 320 px × 240 px. The camera sensor

OV7720 (OmniVision Technologies) was developed for low-light operations, and we found that the sensor is quite sensitive to infrared illumination (once the filter, attached to the lens housing, is removed). To effectively use this camera, we have modified the body for easier mounting and to accept S-mount lenses, as shown in Figures S1 and S2. For reliable imaging of the sphere at a working distance of 10.5 cm we mount a macro lens with 25 mm focal length and an intermediate (fixed) aperture (see Figure 1 b and Figures S1 and S2).

The PS Eye camera is our preferred low cost solution, but due to the modularity of our setup and FicTrac's support for many cameras through OpenCV, many other cameras with similar properties should work. To ensure that our system works reliably on readily available PCs, all tests were run and data were collected while running FicTrac on an older model, multi-core x86-64 system with a maximum frequency of 3 GHz and a hard disk drive running Ubuntu 20.4 LTS. This PC was powerful enough to run two FicTrac instances as well as FlyFlix, the software we developed for stimulus presentation, experiment control, and data logging, and so we expect that most PCs will be able to run these experiments.

### 2.3.6. Lighting.

An important consideration for measuring visually guided behaviors is to use illumination that minimally interferes with the animal's vision. The most practical solution is to use near-infrared (NIR) illumination since fly vision is insensitive to these longer wavelengths (Sharkey et al., 2020), but most camera sensors measure it well. As we operate our camera at high frame rates and with an intermediate aperture lens, intense illumination is essential for reliable sphere tracking, yet the light cannot be so intense as to saturate regions of the image (due to the limited dynamic range of any camera).

To achieve strong, but diffuse NIR illumination, we use three generic 840 nm LEDs placed between the camera and the treadmill, pointing towards the sphere. We designed compact 3D-printed housings that allow flexible positioning of the light sources at the top of posts that are friction fit into the holes on the

716 baseboard, as shown in Figure 1 a,b. We used pieces  
717 of a plastic bag as a diffuser in front of each lamp,  
718 attached with heat shrink tubing. For our setup, we  
719 used a 5 V power supply together with a 470  $\Omega$  current-  
720 limiting resistor. With these lamps in place we adjust  
721 the lights until we obtain images of the sphere that  
722 are bright, yet evenly lit. In our standard setup (our  
723 display set to 25% brightness), we do not need to place  
724 a visible light blocking filter on the camera, although  
725 this could be required for robust ball tracking with  
726 other displays.

### 727 2.3.7. Heatpad for temperature control.

728 We typically run experiments in rooms that are  
729 climate-controlled for the comfort of humans, yet  
730 these conditions are often not ideal for flies. It is  
731 often convenient to increase the temperature of the  
732 walking fly, both since flies walk more often and  
733 faster at elevated temperatures (Soto-Padilla et al.,  
734 2018) and also for using temperature-dependent genetic  
735 reagents such as Shi<sup>ts1</sup> or TrpA1 (Owald et al.,  
736 2015). To inexpensively support warming the fly, we  
737 installed a resistive heater pad underneath the sphere  
738 holder, controlled by a second XH-W1209 temperature  
739 controller (also see Section 2.2.4). We attached a  
740 thermistor to the sphere holder as close to the animal  
741 as possible. The actual temperature at the animal  
742 position might be slightly different (and should be  
743 verified if critical), and we consequently refer to the  
744 XH-W1209 setting as the *target temperature*. For the  
745 experiments detailed below we use a target temperature  
746 of 32 °C.

### 747 2.3.8. Display.

748 A surprisingly wide range of visual stimulus delivery  
749 strategies have been used for insect behavioral  
750 neuroscience: from motor operated moving objects like  
751 patterned drums, to projectors and computer monitors,  
752 to custom-made LED displays (Palermo and Theobald,  
753 2019; Kócsi et al., 2020; Kaushik et al., 2020). In  
754 our lab, we typically use custom-made, modular LED  
755 displays configured as cylinders around the animals,  
756 to deliver stimuli with excellent temporal precision  
757 (Reiser and Dickinson (2008) and future developments

758 documented at <https://reiserlab.github.io/Modular-LED-Display/>). We have not yet succeeded at  
759 producing an inexpensive, widely available display  
760 using LEDs, and so we explored other options.

762 For the inexpensive treadmill setup, we used a widely  
763 available tablet computer with an in-plane switching  
764 (IPS) liquid-crystal display (LCD), an Amazon Fire 7  
765 with a nominal screen size of 7 in. We display visual  
766 patterns through a web browser. To allow replication  
767 across devices we used Mozilla Firefox instead of the  
768 pre-installed browser. We installed the most recent  
769 versions of Firefox and kept the Android 9 based  
770 Fire OS updated with the latest release (most recently  
771 Firefox 86.1.x and Fire OS-7.3.x). We manually set the  
772 display brightness to 25%. The tablet was connected  
773 to a USB power supply and connected to a local WiFi  
774 network during all experiments. To our knowledge,  
775 inexpensive tablets have not been used to test detailed  
776 behavioral responses of flies to moving stimuli, and so  
777 we evaluated both the technical performance of the  
778 display system (Figure 4) as well as the behavioral  
779 responses of flies to tablet-displayed motion stimuli  
780 (Figure 5). Tablets featuring IPS displays with 60 Hz  
781 refresh rate are the most widely available inexpensive  
782 option. It will be interesting to reevaluate new display  
783 technologies (such as OLED) with higher refresh rates  
784 as these become less expensive. Our existing system  
785 could be rapidly adapted to using a student's personal  
786 smartphone instead of a tablet, further reducing cost  
787 (and probably distractions) in teaching environments.

### 788 2.3.9. FlyFlix.

789 By designing our inexpensive treadmill setup around  
790 a network-connected tablet as the visual display, we  
791 remove the need for any specialized IO devices for data  
792 acquisition or graphics cards for stimulus generation,  
793 but we needed to develop software we call FlyFlix,  
794 to control experiments, generate stimuli, and log  
795 data. Figure 1 c shows a simplified flow of information  
796 through the experimental setup. Our display connects  
797 through the web browser to the local URL of the  
798 FlyFlix server. Upon connection, the web server  
799 delivers the most recent version of the FlyFlix client  
800 software (written in JavaScript) as an HTML5 web  
801 page. The implementation follows an event-based

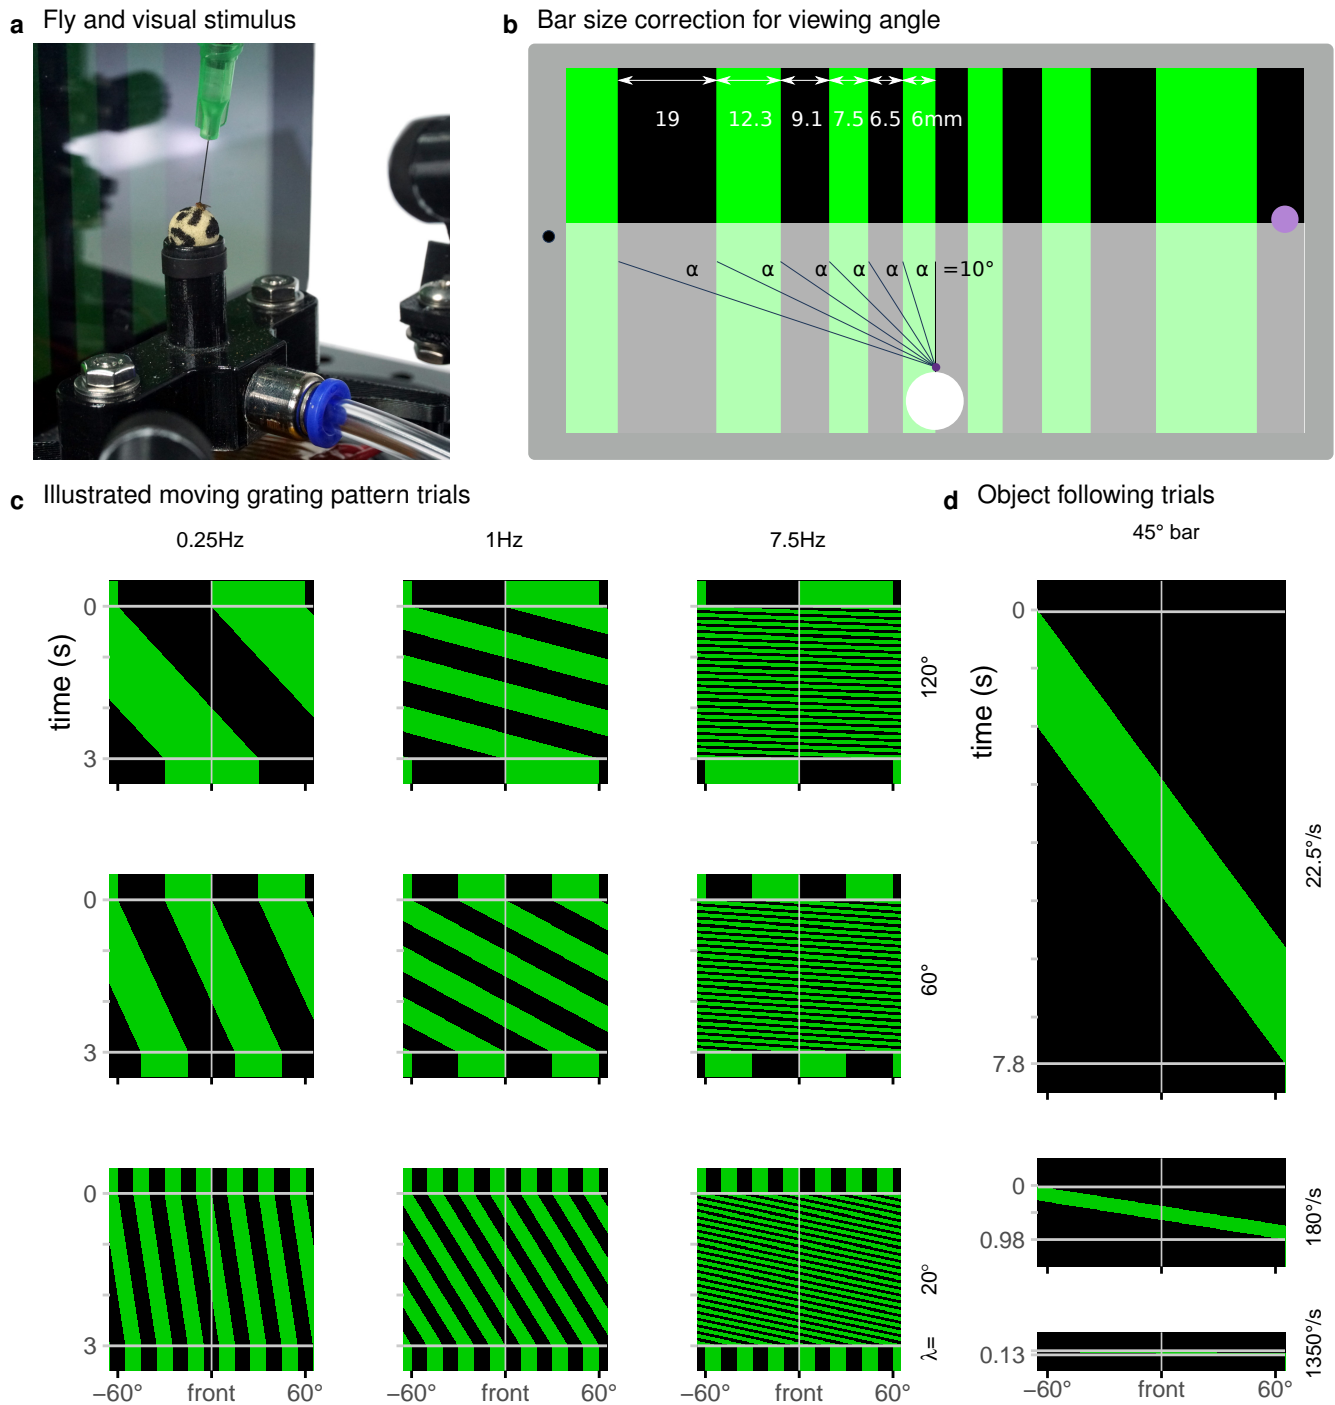

**Figure 3. Display used to present a range of visual stimuli.** (a) In our typical experiment, a tethered fly walked on an air supported foam sphere. The fly faced a mounted tablet computer that displayed a moving grating pattern. (b) The FlyFlix software renders a virtual scene that simulates a cylindrical display onto the flat screen. The azimuthal span of each bar within a grating pattern is scaled to correct for the viewing angle—even though the dark bar on the left is three times as wide as the bright one in the center, they both span  $10^\circ$  from the perspective of the fly positioned 35 mm in front of the display. The purple spot on the right marks the point of light measurement used for Figure 4 a-c. (c) Space-time representations of the display during trials showing a moving grating pattern. Each row of these images represents one horizontal slice through the displayed pattern, at any point in time. For these 3 s trials showing moving patterns with different spatial and temporal frequencies, clock-wise motion appears as space-time tilts that go down and to the left. (d) Representation of displayed screen content during object following conditions for clockwise movement with the indicated speeds.

802 approach with minimal dependencies between client  
803 and server, so that any device capable of displaying  
804 an HTML5 website can act as a client without prior  
805 installation of client software. We have verified that  
806 smartphones and computer monitors can be used to  
807 display the stimuli, but all results reported in this  
808 paper are from experiments using the tablet described  
809 in Section 2.3.8.

810 The FlyFlix client and server communicate over a  
811 bidirectional, low-latency WebSocket connection. The  
812 server can deliver different experiments at specific  
813 URLs, or different views on the same experiment to  
814 different displays (a feature not used in our standard  
815 setup). Once the client connects to the server, it  
816 shows a “Fullscreen” and a “Start” button, the first  
817 changes the client to a full screen mode, while the  
818 seconds sends the request to the server to start  
819 the experiment. Once the protocol finished or the  
820 WebSocket connection is interrupted, the FlyFlix  
821 client displays a button to “Reconnect” to the server.  
822 Once the client starts the experiment, the server  
823 generates a set of trials based on the pre-specified  
824 configuration. The FlyFlix client renders a scene  
825 based on its local representation of the stimulus.  
826 The server sends updated parameters to change the  
827 representation and the client continuously reports  
828 back the actual state of the rendered stimulus. This  
829 bidirectional communication happens throughout the  
830 experiments with time-stamped messages. The FlyFlix  
831 server was implemented in python-3.9 using the Flask-  
832 1.1.2 web framework. Bidirectional communication  
833 from the server-side is based on Flask-SocketIO-5.x  
834 with concurrent networking through Eventlet-0.30.  
835 The client is implemented in JavaScript and uses two  
836 external libraries: Socket.IO-3.1 for the communication  
837 and Three.js-r124 for rendering the visual stimuli.

838 For our ‘gold-standard’ visually guided behavioral  
839 experiments, we wanted to present moving grating  
840 patterns composed of vertical bars across the display.  
841 Depending on the condition, we move different patterns  
842 at different speeds through the frontal visual field  
843 of the fly. Using the 3D graphics library Three.js,  
844 these stimuli are represented as segments of a cylinder  
845 surrounding a virtual camera. These segments are  
846 defined from a basic material that emits color but is

847 not affected by virtual lighting. The virtual cylinder is  
848 305 mm in diameter, matched to the size of a typical  
849 LED arenas used in our lab. The height of the cylinder  
850 exceeds the size of the virtual camera frame. The  
851 virtual camera rendering accounts for the physical  
852 distance between the animal and display (35 mm), and  
853 has the effect of correcting the displayed size of the  
854 cylinder segments so that they span an equivalent  
855 azimuthal size from the fly’s point of view, but span  
856 a different physical size on the display (illustrated in  
857 Figure 3 b for a grating made up of 10° bars). In the  
858 current implementation, we move the bars across the  
859 display by rotating the virtual camera, but we are  
860 updating this to support more complex closed-loop  
861 conditions, where the virtual orientation of the fly and  
862 the position of stimuli will be controlled independently.

863 Experiments are generated and controlled by the  
864 FlyFlix server. Depending on the experimental  
865 condition, the server asynchronously sends parameters  
866 describing the virtual scene to the client. These  
867 parameters primarily concern the scene layout and  
868 rotational speed, orientation, and maximum refresh  
869 rate of the camera. The client continuously renders  
870 new frames based on these parameters. This decouples  
871 the timing of server and client—the server does not  
872 need to consider the capabilities of the client such  
873 as the screen refresh rate, but instead communicates  
874 changes to the virtual world in real-time. Similarly  
875 the client is independent from the server—if there is  
876 a lag in the communication from the server to the  
877 client, the client does not have to wait for instructions  
878 but can instead render frames based on the previously  
879 communicated parameters. The client sends its time-  
880 stamped state to the server, and the FlyFlix server logs  
881 these together with its own time-stamped status to a  
882 file. We characterize the performance of this system  
883 and the network latency in Figure 4.

## 884 2.4. Experimental Protocol.

885 To validate this new experimental setup we wanted to  
886 measure flies carrying out a well-studied visually guided  
887 behavior, the so-called syn-directional optomotor  
888 response, in which the flies steer, by turning, in  
889 the direction of a rotating visual pattern (Götz and  
890 Wenking, 1973; Seelig et al., 2010; Strother et al.,

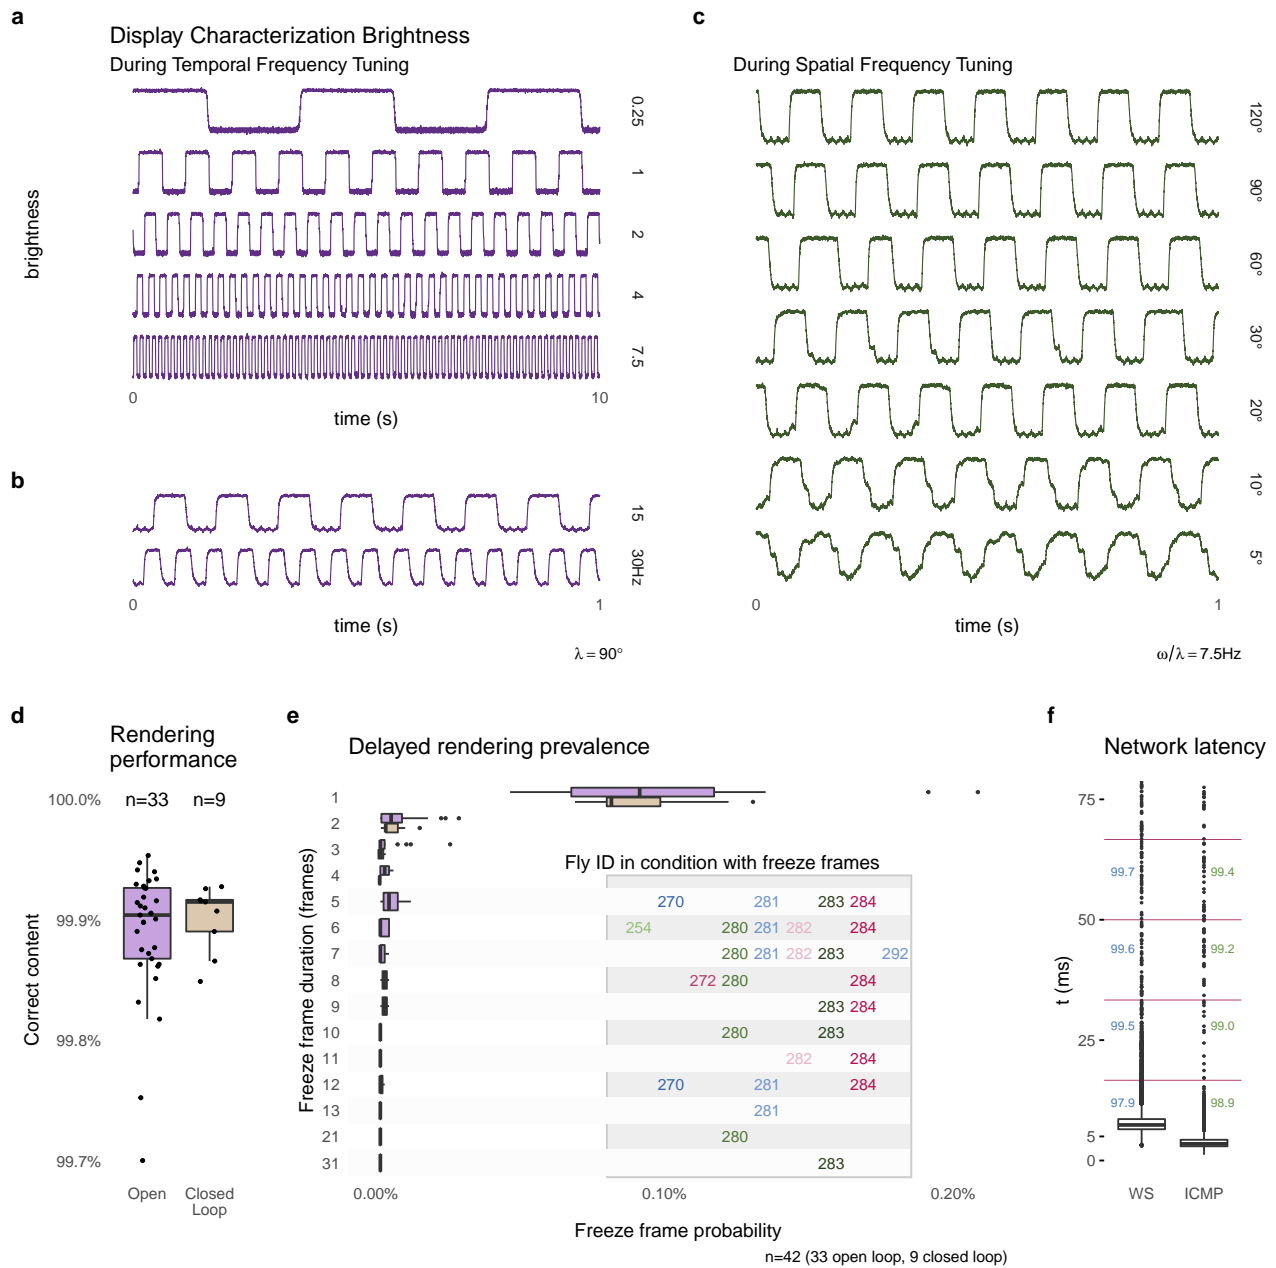

**Figure 4. Technical performance of the experimental setup.** Changes in the display brightness were measured at the approximate location marked in Figure 3 b, during presentation of moving grating patterns. The measurements show a regular pattern that changes at the expected temporal frequency (a,b) and at the same temporal frequency of 7.5 Hz during conditions showing different spatial frequency grating motion (c). The apparent filtering for the patterns with the finest bars is due averaging by the sensor. (d) The percentage of frames that are rendered correctly and within the expected time interval (see text for further details) during open-loop and closed-loop experiments. (e) Details of the frames that were not rendered within 1 frame interval. Most were delayed by a single frame, however, a very small number of longer delays occurred, but all from the same experiments. (f) The measured network latency for a round trip message between FlyFlix server and client through WebSocket compared to a network ping (ICMP). The numbers mark the percentage of round trips that would arrive within the 1<sup>st</sup>, 2<sup>nd</sup>, 3<sup>rd</sup>, or 4<sup>th</sup> ~17 ms display frame (indicated by the vertical lines). Box plots show the first and third quartile for the box, median for the center line, the whisker extend to 1.5 of the inter-quartile range (IQR). d shows all data points, e and f only the outliers as individual points.

2017; Creamer et al., 2018). We recorded responses to open-loop stimulus presentations (in which the response of flies is measured, but not used to control the trajectory of the stimulus) of a periodic grating patterns moving at one of multiple speeds (mapping out the temporal frequency dependence) and a series of patterns composed of different grating periods (to map out the dependence on the spatial frequency). In addition, we also measured object-following behavior, by recording turning responses to single sweeps of bright or dark bars moving at different velocities.

For the temporal frequency tuning (14 conditions total), we showed grating with spatial period of  $\lambda = 90^\circ$  composed of pairs of alternating  $45^\circ$  bright and dark bars. The periodic pattern moves either clockwise or counterclockwise with one of seven angular speeds ( $\omega = 22.5, 90, 180, 360, 675, 1350$  and  $2700^\circ\text{s}^{-1}$ ). For a periodic pattern the temporal frequency is the angular speed divided by the spatial period ( $\omega/\lambda$ ) and so the tested conditions include 0.25, 1, 2, 4, 7.5, 15 and 30 Hz. For the spatial frequency tuning (14 conditions) we tested motion of gratings with one of 7 spatial periods ( $\lambda = 5^\circ, 10^\circ, 20^\circ, 30^\circ, 60^\circ, 90^\circ$  and  $120^\circ$ ) all at a temporal frequency of 7.5 Hz, spanning angular velocities between  $37.5^\circ\text{s}^{-1}$  and  $900^\circ\text{s}^{-1}$ . At the beginning of each trial, the initial position of the pattern is shown stationary for 500 ms, then moved for 3 s and shown stationary again for another 500 ms. Some examples of the patterns displayed in these conditions are shown in Figure 3 c.

In the object following conditions, either a bright or dark vertical  $45^\circ$  bar moves across the screen, exactly once at one of 6 angular speeds ( $\omega = 22.5, 90, 180, 360, 675$  and  $1350^\circ\text{s}^{-1}$ ) in either the clockwise or counterclockwise direction. Consequently these trials are have different length between 0.13 s and 7.8 s. During the 500 ms pre- and post-trial period, the screen is either fully dark for the bright object condition or fully bright for the dark bar. Diagrams illustrating these conditions are shown in Figure 3 d.

In our protocol, the open-loop conditions were interleaved with 3 s closed-loop trials, where the fly's turning controlled the position of the stimulus. We tested a variety of closed-loop conditions (data from

these trials are somewhat ambiguous, and are not shown). For technical verification we extended closed-loop trials to a length of 30 s. These trials are also bracketed between 500 ms pre- and post-trials.

Within an experiment, each set of conditions was presented as randomly ordered blocks. The blocks were then repeated 6 times. We performed two separate experiments for the temporal and spatial frequency mapping data. At the beginning of each protocol there is a delay of 10 s to allow the experimenter to shield the experimental setup from the environment with a box, if desired. The behavioral results are presented in Figure 5.

## 2.5. Fly preparation.

For behavioral experiments, we used the Dickinson Lab wild-type strain of *Drosophila melanogaster*, often referred to as DL flies. The flies were reared on standard cornmeal agar food at  $21^\circ\text{C}$  and 50% humidity. The speed tuning (Figure 5 a–d) and object tracking (Figure 5 g) experiment was conducted on 33 flies 4–7 days post-eclosion. Of these flies, 21 were male and 12 were female. 27 were raised in a 12:12 light-dark cycle and 6 were raised in a 16:8 light-dark cycle. The spatial frequency tuning experiments (Figure 5 e) were conducted on 7 flies (3 males and 4 females) raised in a 16:8 light-dark cycle.

Prior to tethering, we moved groups of approximately four flies from the fly vial to a 5 ml 'Falcon'-style tube (12 mm wide) using a transfer funnel of our design (see Figure S5 (a, b)). After keeping the tube on ice for 5 min, the flies are immobilized and were gently tapped out onto the sorting plate of the tethering station. Individual flies were moved into the sarcophagus with the fly picker, aligned with a paint brush, had glue applied, and then the tether was positioned against and bonded to the fly with UV light curing as described in section 2.2. The chilling of the flies was kept brief, so that no flies were chilled for longer than 23 min. After lifting out of the sarcophagus, tethered flies were placed upside down in a holding area for at least 30 min between tethering and the start of the experiment. Flies were provided with a piece of  $5\text{ mm} \times 5\text{ mm}$  tissue, which they readily manipulate with their legs.



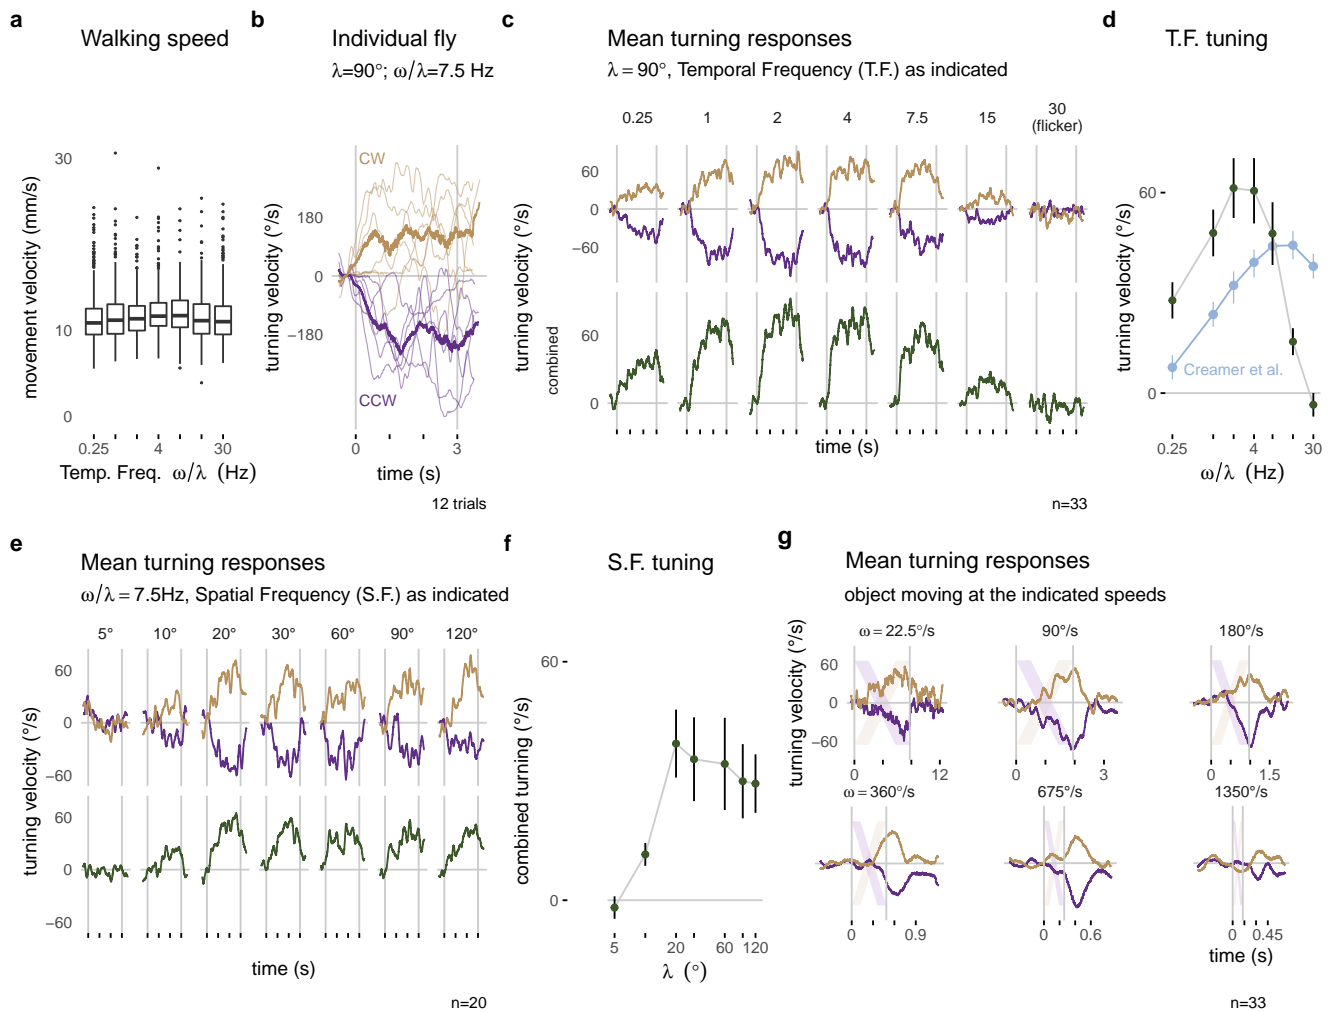

**Figure 5. Visually guided turning behaviors measured with the optimized setup.** Panels along the top row show walking behavior in response to a moving grating pattern with a spatial period of  $\lambda = 90^\circ$ . (a) The forward walking speed of flies across the different conditions ( $n=33$ ). (b) The turning response of a single fly to multiple presentations of 3 s rotational stimuli moving clockwise (CW, yellow) and counterclockwise (CCW, purple). Single trial responses are plotted as thin lines and the mean response across trials is in the thicker line. (c) The mean turning response across all 33 flies: the top row shows the responses to each direction of motion and the combined responses are plotted below. (d) The combined response, averaged during the period of stimulus presentation, is summarized as a tuning curve. For comparison the data in blue is extracted from similar experiments on a different setup, from Figure 1H of Creamer et al. (2018). The mean turning responses for a series of gratings with different spatial periods are plotted in e and summarized as a tuning curve in f. (g) The mean turning responses to presentations of a single  $45^\circ$  bar sweeping across the display. The lightly colored stripes represent the expected position of the bar on the display. The boxplot in a uses first and third quartile to span the box,  $1.5 \cdot \text{IQR}$  for the whiskers and outliers are plotted as individual points. The error bar in d, f are plotted as mean  $\pm$  SEM.

## 978 2.6. Data analysis.

979 FlyFlix and FicTrac store the data in rectangular data  
 980 files. While FicTrac follows a tidy data format, FlyFlix  
 981 uses a key-value based long format. We use a custom  
 982 python script to load these different data formats into a  
 983 consistent SQLite database. Data analysis and plotting

984 is done in R-4.x using the tidyverse-1.3 packages  
 985 including ggplot-3.3.

986 Flies were presented with paired visual stimuli that  
 987 moved in both the clockwise and counterclockwise  
 988 direction. We recorded the ball rotation via FicTrac.  
 989 Out of the 25 recorded variables, we used the ‘animal’s

heading direction (lab)' to estimate intended body yaw rotations and the 'animal movement speed' for the walking velocity. We used 'delta timestamp' to convert frame-based differences into time-based rotational velocity and the physical diameter of the sphere to calculate the movement velocity (Figure 5 a, b). For time series data, the average turning response was calculated for a sliding window of 5 camera frames across all trials of a condition. The responses were averaged on a per-fly basis (see Figure 5 b), before being averaged across flies (top of Figure 5 c,e,g). Responses to counterclockwise stimulus movement were scaled by -1 and averaged together with the clockwise responses for the combined responses (Figure 5 c, e, bottom). The mean turning velocity during stimulus presentation is plotted as mean  $\pm$  SEM across flies for the summary tuning curves (Figure 5 d, f).

### 3 RESULTS.

#### 3.1. Characterizing the technical performance of the experimental setup.

As the inexpensive treadmill setup uses several components not typically used in animal behavior experiments, we measured many aspects of the system's performance, and summarize these results in Figure 4. To validate the Tablet's display of our moving visual stimuli, we measured local brightness changes on one side of the display (position indicated on the right side of Figure 3 b) with a mounted photodiode (INL-3APD80, Inolux Corporation, Santa Clara, CA, USA). The data was viewed and logged on an oscilloscope (MDO3040, Tektronix Inc, Beaverton, OR, USA). Figure 4 a, b shows typical measurements of the brightness changes measured for the moving patterns of the temporal frequency tuning conditions, and Figure 4 c shows typical measurements for moving patterns during the spatial frequency tuning conditions. These measurements suggest that the Fire 7 tablet reliably displays these periodic patterns, for example showing the expected periodic changes at the indicated temporal frequency. We note that even at the 30 Hz condition, which is half of the display refresh rate (lower trace in Figure 3 b), the stimulus timing looks extremely reliable; this condition is included as a

stimulus control, since at half of the display refresh rate, the display flickers, and thus produces no net motion. The spatial frequency conditions show a similarly reliable periodic pattern at 7.5 Hz (Figure 3 c). The reduction in the sharpness of the edge transitions for smaller bars is simply due to spatial averaging by the sensor (and is a reasonable model for why the fly visual system also sees higher spatial frequency patterns as consisting of lower contrast levels).

During experiments, the FlyFlix client records the rendering status for each frame. Before a frame is displayed, the software asynchronously requests an update of the rendered content based on the current set of parameters. If this requests times out before the frame is rendered, then the previous content is shown again. Figure 4 d shows the percentage of frames that are rendered correctly and within the allotted time, which is on average the inter-frame-interval of  $\sim 17$  ms. We plot the percentage of correct frames for 33 open-loop experiments (from which the data of Figure 5 a–d were collected) as well as from 9 closed loop experiments (for which the behavioral data are not shown). For both configurations, the average performance is quite reliable, with more than 99.9% of the frames correctly rendered. Figure 4 e provides details of the  $\sim 0.1\%$  of cases when frames were not rendered in time. We do not find any systematic errors. On average one out of every one thousand frames skips exactly one frame update. Higher numbers of skipped frames are extremely rare, and tend to come in clusters, mostly during conditions with the same animals. Since FlyFlix records these measurements, trials above certain relevant thresholds can be identified post-hoc and removed from analysis.

Since the FlyFlix server FlyFlix client communicate via a network, we characterized the latency of this asynchronous bidirectional communication by sending timestamped packages from the server to the client, which immediately returns the package. In Figure 4 f we plot this WebSocket latency (WS) and also a ping using a lower network level (ICMP). 97.9% of the frames completed a round trip within 1 inter-frame-interval ( $\sim 17$  ms, indicated with vertical magenta lines in the plot) of the display, even though WebSocket based communication takes slightly longer with the

1077 additional protocol overhead. We expect that in our  
1078 real application, the network reliability is even higher,  
1079 since only half of a roundtrip is required to update the  
1080 display.

1081 In our experiments, we used our institute's  
1082 infrastructure: the FlyFlix server was connected to  
1083 a wired network, the tablet connected via WiFi to a  
1084 different subnet. Should the latency of an available  
1085 network become too high, a local network router  
1086 directly connecting FlyFlix server and client will  
1087 improve the timing of the communication.

1088 Taken together, the results of Figure 4, demonstrate  
1089 that a low cost tablet provides a reliable visual  
1090 display producing excellent stimulus control and  
1091 timing over measured system events. These technical  
1092 measurements show that our low cost system replaces  
1093 many components typically required for precise  
1094 experiment control (like Data Acquisition devices or  
1095 high-end PC graphics cards) without sacrificing any  
1096 performance, for the range of pattern speeds and  
1097 network latencies described here.

### 1098 **3.2. Visually guided turning behaviors measured** 1099 **with the optimized setup.**

1100 An important demonstration of our new, integrated  
1101 system, is that 'typical' fly behaviors can be measured  
1102 from flies tethered using our new tethering station and  
1103 behavioral data collected using the new experimental  
1104 setup. We focused on the optomotor responses, and  
1105 present results from (33+20 =) 53 flies across 2  
1106 different protocols (detailed in sections 2.5 and 2.4).  
1107 Figure 5a shows the forward walking speed of flies  
1108 during each trial of the temporal frequency protocol.  
1109 Across speeds, flies walk with a similar speed, with  
1110 a mean around  $10 \text{ mms}^{-1}$  which is slightly higher  
1111 than walking speeds measured in other fly-on-ball  
1112 experiments (Creamer et al., 2018), and is only slightly  
1113 slower than the walking speeds of freely walking flies  
1114 at similar temperature (Ofstad et al., 2011).

1115 When presented with rotating patterns, flies tend  
1116 to turn in the direction of the pattern movement, a  
1117 response we see in single trials and across trials for  
1118 the example condition shown in 5b. While there is  
1119 some trial to trial variability, in nearly every trial,

1120 the flies turn in the clockwise, or positive direction  
1121 (in tan) for clockwise pattern motion and in the  
1122 counterclockwise, or negative direction (in purple)  
1123 for counterclockwise pattern motion, a pattern that  
1124 is clearly seen across flies and stimulus speeds (top  
1125 of 5c). The amplitude of the turning velocity we  
1126 measure depends on the temporal frequency of the  
1127 pattern movement (observable in the data combined  
1128 from both directions, in the lower row of Figure 5c).  
1129 This is precisely the expected result, since temporal  
1130 frequency tuning is a well described aspect of fly  
1131 motion vision—insects are most sensitive to movement  
1132 of periodic pattern with some temporal frequency  
1133 optimum, and are less sensitive to movements with  
1134 both higher and lower temporal frequency (Götz and  
1135 Wenking, 1973). We compare our results, plotted using  
1136 the mean responses during the period of stimulus  
1137 presentation as a tuning curve, to the most relevant,  
1138 recent independent measurement from another lab  
1139 using a different setup (Figure 5d contains an overlay  
1140 of data from Creamer et al. (2018)). We find that in our  
1141 experiments, for most conditions, flies are tuning more  
1142 overall, and we see similar, monotonically increasing  
1143 response levels up to 7.5 Hz motion. At the highest  
1144 temporal frequencies we see an interesting difference—  
1145 our responses fall off, while the responses from Creamer  
1146 et al. (2018) remain much larger. We attribute this  
1147 difference to limitations of our display, which as we  
1148 have discussed, cannot properly display 30 Hz temporal  
1149 frequency motion, and renders it as flicker. Overall, we  
1150 find excellent concordance between our measurements  
1151 and those of previous experimenters.

1152 The optomotor turning response is also expected  
1153 to depend on the spatial frequency of the grating  
1154 pattern (Buchner, 1976; Creamer et al., 2018). We  
1155 presented a series of grating patterns with different  
1156 spatial periods at a fixed temporal frequency of 7.5 Hz.  
1157 We observe large, consistent turning to patterns with  
1158 a grating period above  $\lambda = 20^\circ$  (Figure 5e, f). For  
1159 narrower stripes, the responses are reduced, and in fact  
1160 no consistent turning was measured for the pattern  
1161 with  $\lambda = 5^\circ$ . This result is expected based on prior  
1162 work, and is remarkably similar to the measurement  
1163 of Buchner (1976), who used a very different stimulus  
1164 strategy.

1165 Finally we tested the flies ability to track a moving  
1166 bar, a behavior that is known to depend on both the  
1167 motion and position of the moving object (Poggio and  
1168 Reichardt, 1973; Bahl et al., 2013). As with the rotating  
1169 grating patterns, we find that flies turn so as to follow  
1170 the direction of the rotating bar (Figure 5 g). The peak  
1171 turning velocity is similar between different rotational  
1172 velocities of the stimulus, and quite similar to peak  
1173 turning during the grating motion. To casually explore  
1174 the position-dependence of the turning response, it  
1175 suffices to note that most of the turning reaction  
1176 occurs once the object (position indicated by the  
1177 diagonal lines) has crossed the midline (most notable  
1178 for  $\omega = 90^\circ \text{s}^{-1}$ ,  $180^\circ \text{s}^{-1}$ , and  $360^\circ \text{s}^{-1}$ . It is as if  
1179 the flies don't bother to orient towards an object they  
1180 are likely to intercept as it approaches their midline,  
1181 but once an object is getting away (as measured by its  
1182 progressive, or front-to-back motion), the attempted  
1183 tracking behavior rapidly increases. This response  
1184 profile matches the recent measurements of walking  
1185 flies (Bahl et al., 2013), but differs somewhat from the  
1186 behavioral reactions of tethered flying flies that respond  
1187 to both the regressive and progressive motion of the  
1188 object (Reiser and Dickinson, 2010). For the fastest  
1189 speeds tested, the flies cannot track, that is 'catch up to'  
1190 the spinning bar, and the responses are seen to lag the  
1191 position of the stripe by more than 100 ms. The flies'  
1192 turning velocity almost disappears at the condition  
1193 with the stimulus angular velocity of  $\omega = 1350^\circ \text{s}^{-1}$ .  
1194 In this condition, the object moves across the 60 fps  
1195 display in less than 8 frames with displacements of  
1196 more than  $20^\circ$  between frames, which are too large for  
1197 the fly to smoothly integrate as motion. Consequently,  
1198 the turning response is barely noticeable.

1199 In Figure 5 we summarize the behavior of *Drosophila*  
1200 in our optimized, inexpensive treadmill setup, in  
1201 a sophisticated range of stimulus conditions. We  
1202 show clear symmetric turning responses to all  
1203 symmetric stimulus conditions. The temporal and  
1204 spatial frequency tuning as well as the object  
1205 tracking behaviors are highly similar to previously  
1206 published measurements from other labs using different  
1207 experimental setups. Based on these results, we  
1208 unreservedly recommend this low-cost setup, not only

1209 for teaching purposes, but for nearly any research  
1210 application.

## 4 DISCUSSION.

1211 In this paper we have described our re-implementation  
1212 of a complete system for tethering flies and the  
1213 accompanying experimental setup for measuring  
1214 tethered fly walking behavior to controlled visual  
1215 stimuli (Figures 1,2). Our spherical treadmill setup  
1216 takes a fresh look at the fly-on-a-ball paradigm. While  
1217 the design is guided by several decades of experimental  
1218 methods development, we are intensely focused on  
1219 optimizing the setup by simplifying the components,  
1220 reducing costs, and ensuring availability. Since many of  
1221 the components have not previously been deployed in  
1222 animal behavior setups, we validated the performance  
1223 of the display (Figure 4). We found excellent reliability for  
1224 the low-cost display and low network latencies, which  
1225 combine to establish a highly reliable new method  
1226 for experimental control. This system comes with  
1227 other advantages such as a flexible stimulus control  
1228 software that can dynamically correct for the viewing  
1229 angle (Figure 3). Finally, we measured the walking  
1230 behavior of flies to a range of moving visual stimuli  
1231 and confirmed, in exquisite detail, that our new setup  
1232 is capable of reproducing nearly all relevant prior  
1233 measurements using similar visual stimuli. Based on  
1234 this experience we believe that our setup will be ideal  
1235 for use in teaching courses and for a wide range of  
1236 laboratory uses. We sincerely hope that the reduced  
1237 complexity and enhanced accessibility of these setups  
1238 will excite many young scientists about quantitative  
1239 animal behavior, and will increase the reproducibility  
1240 of research observations. In the following sections  
1241 we discuss cost savings of our system, the cost of  
1242 cost savings in the form of limitations, some possible  
1243 extensions and future work.

### 4.1. Costs and Availability.

1245 We cannot claim a system to be inexpensive without  
1246 estimating the cost of acquiring such a system, and also  
1247 comparing it to a contemporary alternative. We have  
1248 estimated the cost based on building a single setup,  
1249 using parts available in the US, during the spring of

1250 2021. Many of the components are available as generic  
1251 parts from multiple vendors, we have selected example  
1252 sources to illustrate the price range for potential cost  
1253 savings and overall costs. We provide links for the  
1254 same purpose, and these are not an endorsements  
1255 for or against particular vendors, especially since the  
1256 products might not be available in different countries.  
1257 We estimate the prices for 3D printed components using  
1258 the online instant quote at <https://craftcloud3d.com>.  
1259 For the laser cutting, we use estimates from <https://ponoko.com>.  
1260 Those with access to a 3D printer or a  
1261 laser cutter can expect to save a little more money.

1262 For the comparison to a contemporary setup, we  
1263 surveyed several groups and specified a system that  
1264 would realistically represent the type of setup we would  
1265 build in our lab today for ongoing research projects.  
1266 Below we detail a few key components, and summarize  
1267 the systems' cost in Table 1 and Table 2, and in  
1268 Figure 6). Figure 6 shows that we can assemble both  
1269 complete systems for ~\$300, whereas the standard,  
1270 yet very nice, pair of setups would cost ~\$15,000, a  
1271 remarkable 50-fold cost reduction.

1272 Software: A simple way to reduce costs and increase  
1273 access is to exclusively use open-source software. From  
1274 GNU/Linux as the operating system, to FicTrac,  
1275 camera drivers, FlyFlix, and Firefox, all are available  
1276 without paying software licenses. Furthermore, the  
1277 majority of the components in the Component-  
1278 Designs GitHub repository are constructed using freely  
1279 available software such as FreeCAD, KiCAD, and  
1280 Inkscape, which enables the unrestricted exchange of  
1281 design files.

1282 Baseplate: We used an acrylic board with a grid  
1283 of holes, which can save more than \$100 per setup  
1284 compared to a professional optomechanical board. If  
1285 available, a laser cutter is ideal for fabricating these  
1286 boards within minutes. In the accompanying repository  
1287 we provide files for laser cutter, CNC-machines, or as  
1288 a blueprint for hand-drilling.

1289 Camera: We use a PlayStation Eye as the input for  
1290 FicTrac. We could not find another widely available  
1291 low cost camera that achieves high frame rate imaging.  
1292 Since it is mass-produced as a toy, they are available  
1293 at different vendors and secondary markets for around

1294 \$5 to \$20. We describe the required modifications  
1295 with a macro lens (\$15) and M12 lens holder (\$2)  
1296 in the supplements. This modification takes between  
1297 30 min and 60 min (see Figures S1 and S2).

1298 Micromanipulator: Finding low-cost alternatives for  
1299 this enabling tool was one of the initial drivers of this  
1300 project. With the purchase of three-axis linear stages  
1301 at an overseas vendors, cost savings of up to 80% on  
1302 that one part enabled us to build several setups for  
1303 the teaching course (shown in Figure S3). Nevertheless,  
1304 at \$80 to \$100, they are still a considerable expense,  
1305 especially if using two per setup. For labs with access  
1306 to a 3D printer, our design of the micromanipulator  
1307 costs less than \$5 in materials (including nuts and  
1308 screws). Ordering the parts through 3D printing  
1309 services increases the cost to around \$15. In addition to  
1310 printing time, ~ 1 h of build time is required. Similarly  
1311 the Sphere holder is easy to adapt and cheap to  
1312 print with material costs below \$3 and online services  
1313 charging around \$6.

#### 1314 4.2. Trade-offs and limitations.

1315 The flexibility and modularity of our proposed system  
1316 is also a limitation: it takes more time and effort to  
1317 make and assemble the systems based on components  
1318 from multiple vendors, rather than ordering ready-  
1319 made products. We sought to replace all custom parts  
1320 with commercially available inexpensive components  
1321 wherever possible, such as the display system or the  
1322 tethers, but in many cases, no alternative existed and  
1323 we turned to custom designs.

1324 Many components of our setup are produced in a  
1325 3D printer or a laser cutter. This may increase access  
1326 compared to custom-machines metal parts, but it is  
1327 still a limitation. Nevertheless, we see three main  
1328 alternatives to access these parts: (1) high quality  
1329 3D printers are becoming more affordable and easier to  
1330 use, (2) maker spaces provide access to 3D printers in  
1331 communities across the world, and (3) many companies  
1332 offer 3D prints as a service. We used the third (and  
1333 most expensive) option in our cost estimates (Figure 6).  
1334 We consider access to a laser cutter as nice, but not  
1335 necessary for building this setup (alternatives discussed  
1336 throughout). The factors regarding price, maker spaces,

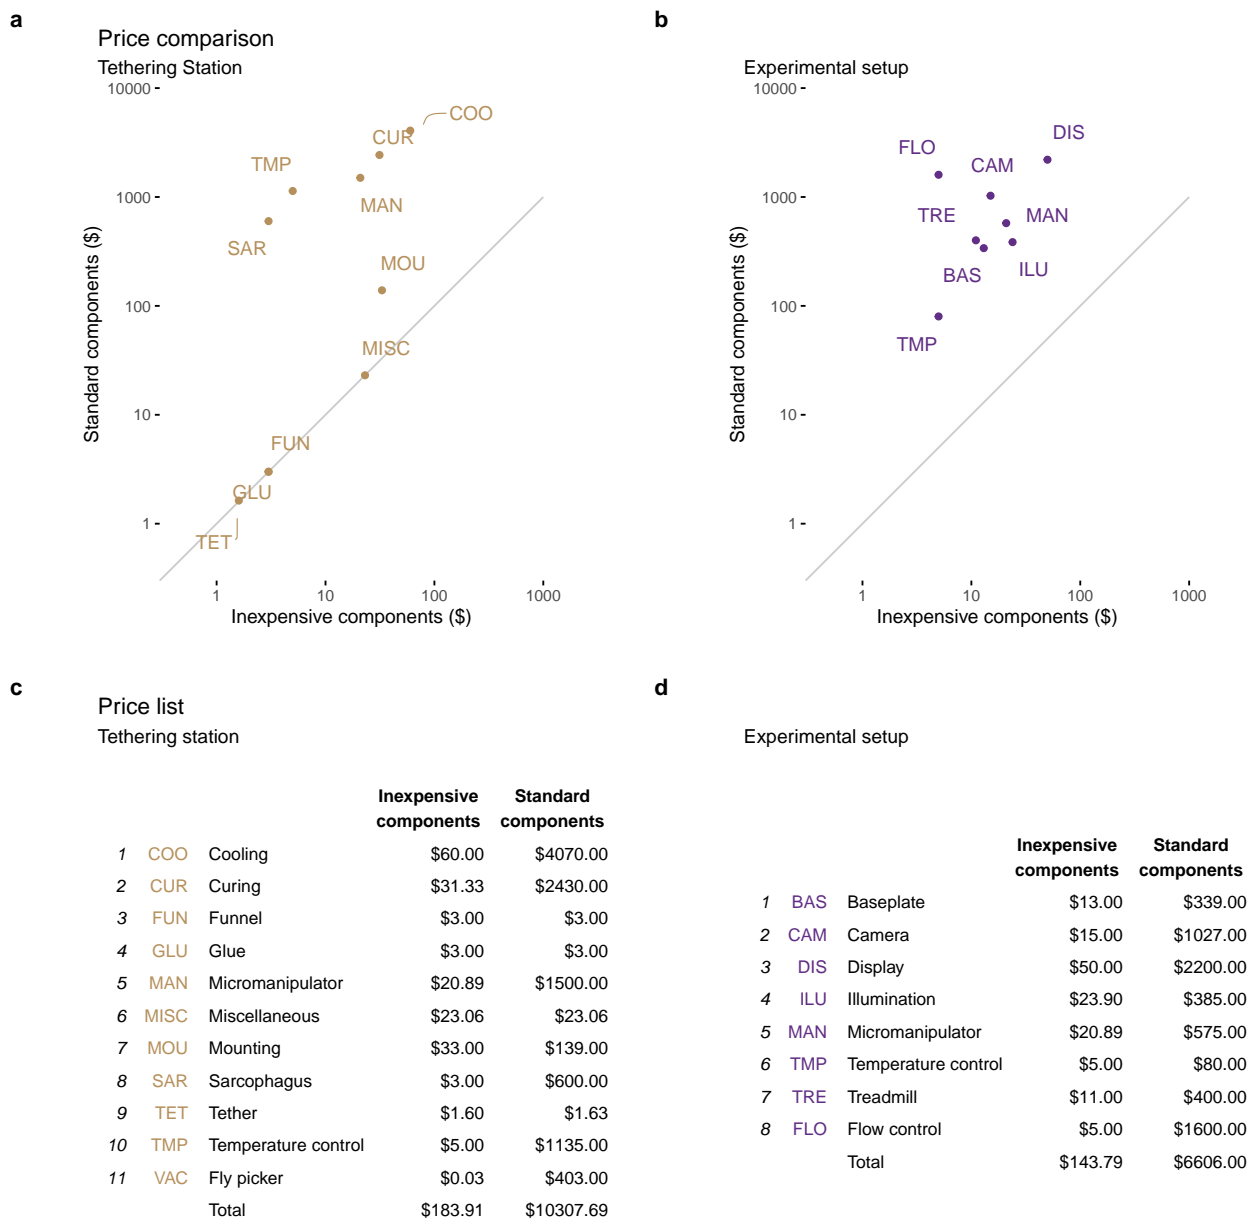

**Figure 6. Estimated cost savings for each setup.** The price of each functional unit is compared between the standard setups and the optimized, inexpensive tethering station **a** and experimental (treadmill) setup **b**. The line in each of **a,b** represents an equal price in both setups. In **c** and **d** we list the components (or functional units) represented by the labels in **a** and **b**. We estimate a roughly 50-fold cost savings between the two versions of these systems. Further details are provided in the text and in the accompanying tables of components

1337 and online services also apply to laser-cutting acrylics.  
 1338 Building a new experimental setup is always a time-  
 1339 consuming endeavor, but even more so when the  
 1340 components need to be built from scratch. We estimate  
 1341 ~5 h of printing time on the Stratasys F-170 printer.

1342 We further estimate that another ~5 h are necessary  
 1343 for assembling the first setup. Times will vary greatly  
 1344 and assembly will speed up over time.

1345 FlyFlix, the system of a single server providing  
 1346 stimuli for network connected display clients, is

1347 extensible to many displays. Nevertheless, for the  
1348 current description we limited the use to a single display  
1349 in front of the fly covering  $\sim 130^\circ$  in azimuth and  $100^\circ$   
1350 in elevation. In our standard fly behavioral setups, we  
1351 prefer to stimulate larger portions of the fly's field of  
1352 view, especially laterally. Furthermore, the tablet we  
1353 chose only supports refresh rates of 60 fps. This limits  
1354 the speed of stimuli that can be shown, including to  
1355 motion speeds that the fly can perceive (see Figure 5 d).  
1356 Newer handheld displays with higher refresh rates and  
1357 gaming monitors used in other experimental setups  
1358 overcome this limitation, but at significantly increased  
1359 cost (Kaushik et al., 2020). The FlyFlix software is  
1360 agnostic to the display and should work out of the  
1361 box with higher refresh rates. Nevertheless, network  
1362 latency will be a limiting factor for high-speed closed-  
1363 loop systems, but there is little reason to believe that  
1364 flies (or just about any animal) required closed loop  
1365 latencies that are less than  $\sim 10$ ms.

#### 1366 4.3. Extensions and future work.

1367 The inexpensive treadmill project was inspired by the  
1368 challenge of setting up multiple rigs in a teaching  
1369 lab to provide hands-on experience with *Drosophila's*  
1370 fascinating walking responses to visual stimuli. The  
1371 setup has been optimized and so far only tested with  
1372 fruit flies. Nevertheless, we expect that adapting the  
1373 setup to other insects should be straightforward. The  
1374 *Sarcophagus* already accommodates many body sizes  
1375 and could be modified for others. A much larger  
1376 insect may require a larger ball size, but fortunately,  
1377 the nature of our manufacturing process and the  
1378 availability of our 3D designs allows any components  
1379 to be scaled to adapt to specific animal sizes.

1380 While we have focused on visually guided behaviors  
1381 with this setup, it would be very exciting to implement  
1382 other types of sensory stimulation: wind, humidified  
1383 air, sounds, odors, or even polarized light (Mathejczyk  
1384 and Wernet, 2020). All of these can be integrated into  
1385 our experimental design with little to no modification  
1386 to the existing components.

1387 While we have achieved all of our initial goals, we  
1388 continue working to improve the system. We are testing  
1389 more accessible alternatives to our hand-filed balls and

1390 seeking a good replacement for laboratory wall air  
1391 to float the ball. While we have implemented closed-  
1392 loop protocols and confirmed that they are technically  
1393 working, we have so far not been impressed with the  
1394 behavioral results from these trials, and so we continue  
1395 to optimize those methods. Finally we will implement  
1396 a low-cost solution for optogenetic stimulation of the  
1397 walking flies, and will adapt the setup as needed  
1398 so that it can be mounted under a microscope  
1399 to accommodate electrophysiology or imaging. All  
1400 updates will be posted on the accompanying repository  
1401 and we welcome feedback, ideas, and contributions  
1402 from the research community.

Table 1 Price estimation of parts for Experimental setup.

| Part                | Description           | Vendor              | Price  |
|---------------------|-----------------------|---------------------|--------|
| sphere              | milled or filed       | generalplastics.com |        |
| Display             | Amazon Fire Tablet    | amazon.com          | \$50   |
| Baseplate           | Acrylic Material only | mcmaster.com        | \$13   |
| Temperature control | Heatpad thermostat    | amazon.com          | \$5    |
| Camera              | PS3 Eye               | ebay.us             | \$15   |
| Micro Manipulator   | 3D printed (ABS)      | github.com          | \$20   |
| Screw               | M3x0.5 40mm           | mcmaster.com        | \$0.49 |
| Locking nuts        | M3x0.5                | mcmaster.com        | \$0.11 |
| Nuts                | M3x0.5                | mcmaster.com        | \$0.06 |
| Washer              | M3                    | mcmaster.com        | \$0.23 |
| Sphere holder       | 3D printed (ABS)      | github.com          | \$6    |
| Sphere holder post  | 3D printed (ABS)      | github.com          | \$5    |
| Lamp post and shade | 3D printed (ABS)      | github.com          | \$15   |
| IR LED              | 940nm 5mm LED         | digikey.com         | \$0.9  |
| Power supply        | Any 5V power source   | adafruit.com        | \$8    |
| Tube Clamp          | Keck Roller Clamp     | usplastic.com       | \$5    |

Table 2 Suggestion for components in an inexpensive treadmill tethering station.

| Part                  | Description                   | Vendor      | Price |
|-----------------------|-------------------------------|-------------|-------|
| microscope            | various; any dissecting scope |             |       |
| glue                  | glass to glass adhesive       | kemxert.com | \$3   |
| UV protective glasses | many                          |             | \$30  |

*Continued on next page*



Table 2 Suggestion for components in an inexpensive treadmill tethering station.

| Part                   | Description                     | Vendor       | Price  |
|------------------------|---------------------------------|--------------|--------|
| Fly picker wand        | Transfer Pipette                | amazon.com   | \$0.03 |
| Temperature control    | Chiller peltier thermostat      | amazon.com   | \$5    |
| Tether                 | Blunt tip dispensing needle 34G | bstea.com    | \$1.6  |
| Funnel                 | 3D printed (PLA, ABS)           | github.com   | \$3    |
| Micro Manipulator      | 3D printed (ABS)                | github.com   | \$20   |
| Screw                  | M3x0.5 40mm                     | mcmaster.com | \$0.49 |
| Locking nuts           | M3x0.5                          | mcmaster.com | \$0.11 |
| Nuts                   | M3x0.5                          | mcmaster.com | \$0.06 |
| Washer                 | M3                              | mcmaster.com | \$0.23 |
| Heat pump              | Peltier element on heat sink    | adafruit.com | \$35   |
| Heat pump power supply | 12V 5A                          | adafruit.com | \$25   |
| Sarcophagus            | 3D printed (ABS)                | github.com   | \$3    |
| Tether Station holder  | Laser cut (acrylic)             | github.com   | \$15   |
| UV Curing light        | UV Keychain light               | amazon.com   | \$1.33 |
| Paintbrush             | NA                              | amazon.com   | \$7    |
| Round bottom tube      | Chilling tube                   | mcmaster.com | \$0.06 |
| Heat sink holder       | Hand rest                       | ponoko.com   | \$18   |
| Hollow Body Pin Vise   | Flyhook holder                  | mcmaster.com | \$16   |

## CONFLICT OF INTEREST STATEMENT.

The authors declare that the research was conducted in the absence of any commercial or financial relationships that could be construed as a potential conflict of interest.

## ACKNOWLEDGMENTS.

We wish to thank the *Drosophila* Neurobiology: Genes, Circuits & Behavior course (and organizers E. Heckscher, A. Keene, and A. Frank) for inspiring us to work on this project. We thank R. Franconville for using and providing feedback on an early iteration of the setup in a summer course. H. Haberkern for FicTrac consultation, I. Negrashov and J. Talbot for engineering assistance, E. Gruntman for advice and testing, and E. Rogers for help with flies. We are also grateful to members of the Reiser Lab for comments on the work and manuscript.

## AUTHOR CONTRIBUTIONS.

M.B.R. and F.L. conceived of the project and wrote the paper together. F.L. developed methodology, wrote software, carried out experiments, and analyzed data.

## FUNDING.

This project was supported by HHMI.

## REFERENCES.

- Baden, T., Chagas, A. M., Gage, G., Marzullo, T., Prieto-Godino, L. L., and Euler, T. (2015). Open Labware: 3-D Printing Your Own Lab Equipment. *PLoS Biology* 13, e1002086. doi:10.1371/journal.pbio.1002086
- Bahl, A., Ammer, G., Schilling, T., and Borst, A. (2013). Object tracking in motion-blind flies. *Nature Neuroscience* 16, 730–738. doi:10.1038/nn.3386
- Bellen, H. J., Tong, C., and Tsuda, H. (2010). 100 years of *Drosophila* research and its impact on vertebrate neuroscience: a history lesson for the future. *Nature Reviews Neuroscience* 11, 514–522. doi:10.1038/nrn2839
- Benzer, S. (1967). Behavioral Mutants of *Drosophila* Isolated by Countercurrent Distribution. *Proceedings of the National Academy of Sciences* 58, 1112–1119. doi:10.1073/pnas.58.3.1112
- Buchner, E. (1976). Elementary movement detectors in an insect visual system. *Biological Cybernetics* 24, 85–101. doi:10.1007/bf00360648
- Chagas, A. M., Prieto-Godino, L. L., Arrenberg, A. B., and Baden, T. (2017). The €100 lab: A 3D-printable open-source platform for fluorescence microscopy, optogenetics, and accurate temperature control during behaviour of zebrafish, *Drosophila*, and *Caenorhabditis elegans*. *PLoS Biology* 15, e2002702. doi:10.1371/journal.pbio.2002702
- Creamer, M. S., Mano, O., and Clark, D. A. (2018). Visual Control of Walking Speed in *Drosophila*. *Neuron* 100, 1460–1473.e6. doi:10.1016/j.neuron.2018.10.028
- Dombeck, D. A. and Reiser, M. B. (2012). Real neuroscience in virtual worlds. *Current Opinion in Neurobiology* 22, 3–10. doi:10.1016/j.conb.2011.10.015

- Findsen, A., Pedersen, T. H., Petersen, A. G., Nielsen, O. B., and Overgaard, J. (2014). Why do insects enter and recover from chill coma? Low temperature and high extracellular potassium compromise muscle function in *Locusta migratoria*. *Journal of Experimental Biology* 217, 1297–1306. doi:10.1242/jeb.098442
- Gibert, P. and Huey, R. B. (2001). Chill-Coma Temperature in *Drosophila*: Effects of Developmental Temperature, Latitude, and Phylogeny. *Physiological and Biochemical Zoology* 74, 429–434. doi:10.1086/320429
- Götz, K. G. (1964). Optomotorische Untersuchung des visuellen Systems einiger Augenmutanten der Fruchtfliege *Drosophila*. *Kybernetik* 2, 77–92. doi:10.1007/bf00288561
- Götz, K. G. and Wenking, H. (1973). Visual control of locomotion in the walking fruitfly *Drosophila*. *Journal of Comparative Physiology* 85, 235–266. doi:10.1007/bf00694232
- Harbottle, J., Strangward, P., Alnuamaani, C., Lawes, S., Patel, S., and Prokop, A. (2016). Making research fly in schools: *Drosophila* as a powerful modern tool for teaching biology. *School Science Review* 97, 18–22
- Heisenberg, M. and Buchner, E. (1977). The role of retinula cell types in visual behavior of *Drosophila melanogaster*. *Journal of comparative physiology* 117, 127–162. doi:10.1007/bf00612784
- Kaushik, P. K., Renz, M., and Olsson, S. B. (2020). Characterizing long-range search behavior in Diptera using complex 3D virtual environments. *Proceedings of the National Academy of Sciences* 117, 12201–12207. doi:10.1073/pnas.1912124117
- Kócsi, Z., Murray, T., Dahmen, H., Narendra, A., and Zeil, J. (2020). The Antarium: A Reconstructed Visual Reality Device for Ant Navigation Research. *Frontiers in Behavioral Neuroscience* 14. doi:10.3389/fnbeh.2020.599374
- Lehmann, F. O. and Dickinson, M. H. (1997). The changes in power requirements and muscle efficiency during elevated force production in the fruit fly *Drosophila melanogaster*. *Journal of Experimental Biology* 200, 1133–1143
- Lott, G. K., Rosen, M. J., and Hoy, R. R. (2007). An inexpensive sub-millisecond system for walking measurements of small animals based on optical computer mouse technology. *Journal of Neuroscience Methods* 161, 55–61. doi:10.1016/j.jneumeth.2006.10.007
- Mathejczyk, T. F. and Wernet, M. F. (2020). Modular assays for the quantitative study of visually guided navigation in both flying and walking flies. *Journal of Neuroscience Methods* 340, 108747. doi:10.1016/j.jneumeth.2020.108747
- Moore, R. J. D., Taylor, G. J., Paulk, A. C., Pearson, T., van Swinderen, B., and Srinivasan, M. V. (2014). FicTrac: A visual method for tracking spherical motion and generating fictive animal paths. *Journal of Neuroscience Methods* 225, 106–119. doi:10.1016/j.jneumeth.2014.01.010
- Ofstad, T. A., Zuker, C. S., and Reiser, M. B. (2011). Visual place learning in *Drosophila melanogaster*. *Nature* 474, 204–207. doi:10.1038/nature10131
- Owald, D., Lin, S., and Waddell, S. (2015). Light, heat, action: neural control of fruit fly behaviour. *Philosophical Transactions of the Royal Society B: Biological Sciences* 370, 20140211. doi:10.1098/rstb.2014.0211
- Palermo, N. and Theobald, J. (2019). Fruit flies increase attention to their frontal visual field during fast forward optic flow. *Biology Letters* 15, 20180767. doi:10.1098/rsbl.2018.0767
- Poggio, T. and Reichardt, W. (1973). A theory of the pattern induced flight orientation of the fly *Musca domestica*. *Kybernetik* 12, 185–203. doi:10.1007/bf00270572
- Reiser, M. B. and Dickinson, M. H. (2008). A modular display system for insect behavioral neuroscience. *Journal of Neuroscience Methods* 167, 127–139. doi:10.1016/j.jneumeth.2007.07.019

- Reiser, M. B. and Dickinson, M. H. (2010). *Drosophila* fly straight by fixating objects in the face of expanding optic flow. *Journal of Experimental Biology* 213, 1771–1781. doi:10.1242/jeb.035147
- Seelig, J. D., Chiappe, M. E., Lott, G. K., Dutta, A., Osborne, J. E., Reiser, M. B., et al. (2010). Two-photon calcium imaging from head-fixed *Drosophila* during optomotor walking behavior. *Nature Methods* 7, 535–540. doi:10.1038/nmeth.1468
- Sharkey, C. R., Blanco, J., Leibowitz, M. M., Pinto-Benito, D., and Wardill, T. J. (2020). The spectral sensitivity of *Drosophila* photoreceptors. *Scientific Reports* 10, 1–13. doi:10.1038/s41598-020-74742-1
- Soto-Padilla, A., Ruijsink, R., Sibon, O. C. M., van Rijn, H., and Billeter, J.-C. (2018). Thermosensory perception regulates speed of movement in response to temperature changes in *Drosophila melanogaster*. *The Journal of Experimental Biology* 221, jeb174151. doi:10.1242/jeb.174151
- Strother, J. A., Wu, S.-T., Wong, A. M., Nern, A., Rogers, E. M., Le, J. Q., et al. (2017). The Emergence of Directional Selectivity in the Visual Motion Pathway of *Drosophila*. *Neuron* 94, 168–182.e10. doi:10.1016/j.neuron.2017.03.010
- Vishniakou, I., Plöger, P. G., and Seelig, J. D. (2019). Virtual reality for animal navigation with camera-based optical flow tracking. *Journal of Neuroscience Methods* 327, 108403. doi:10.1016/j.jneumeth.2019.108403

# Supplementary Material for “An inexpensive, high-precision, modular spherical treadmill setup optimized for *Drosophila* experiments”

## 1 FIGURES.

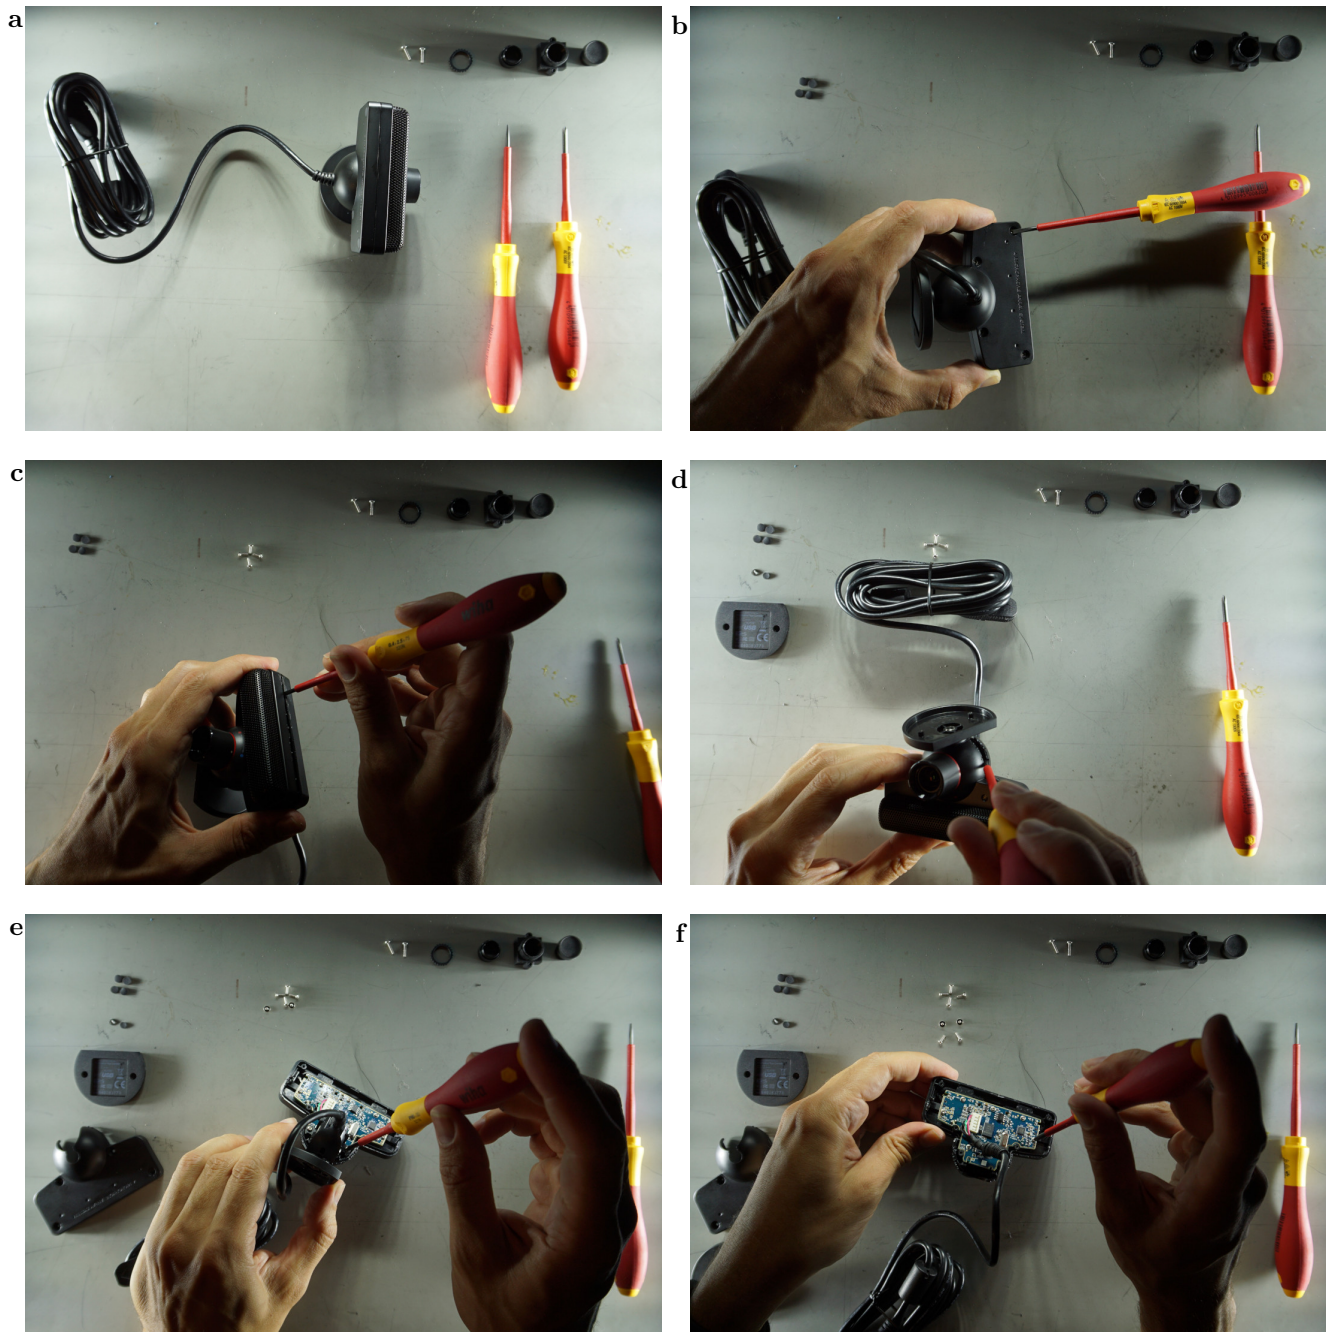

**Figure S1. Disassembling the camera:** a: Tools and parts required for modification. b: Unscrew the back of the camera. c, d: Carefully break notches holding back and front together. e, f: Unscrew cable holder and PCB.

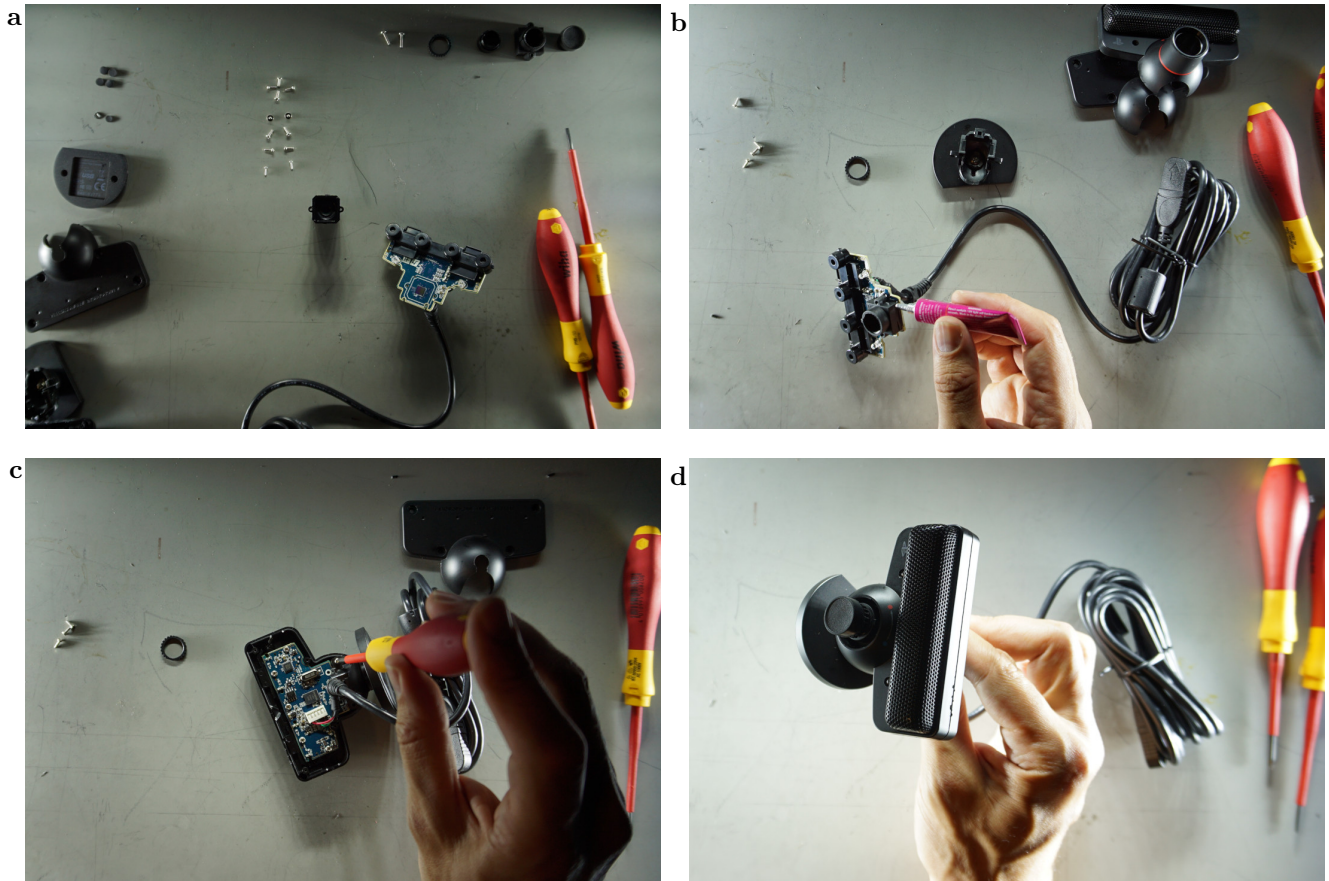

**Figure S2. Modifying the camera:** a: remove the lens from the front of the PCB. b: Attach the M12 lens mount in the same place. c: reattach PCB to camera case. d: Close camera case. Without the broken notches removed in Figure S1 c, some glue is needed. In the picture, the macro lens has a lens cover.

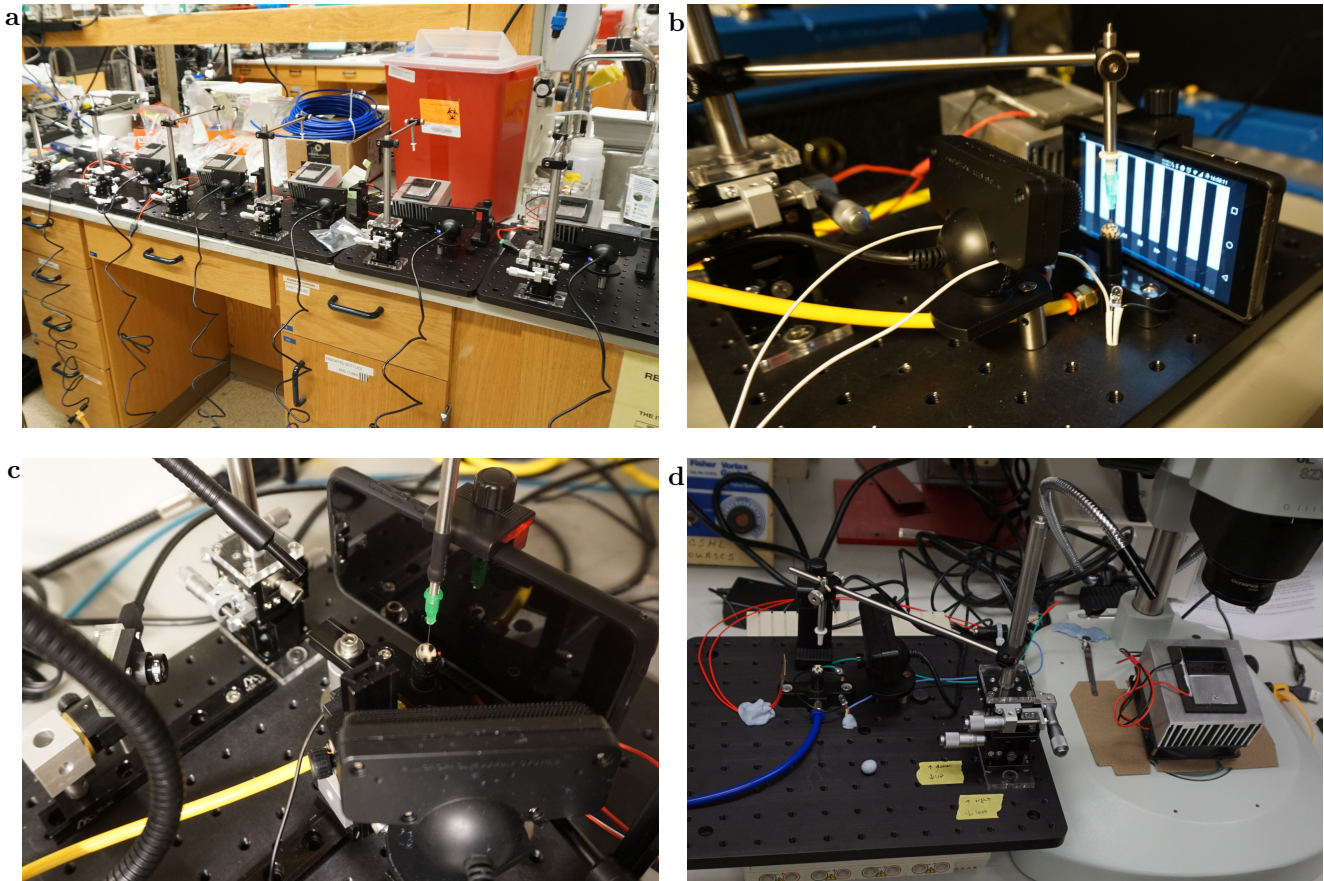

**Figure S3. Early versions of these setups:** a: 6 setups used in the CSHL course. b: Shared Micromanipulator in combined tethering and experimental setup. c: Prototyping camera angles and display sizes d: Shared Micromanipulator between tethering and experiment, for a heating setup, without the display.

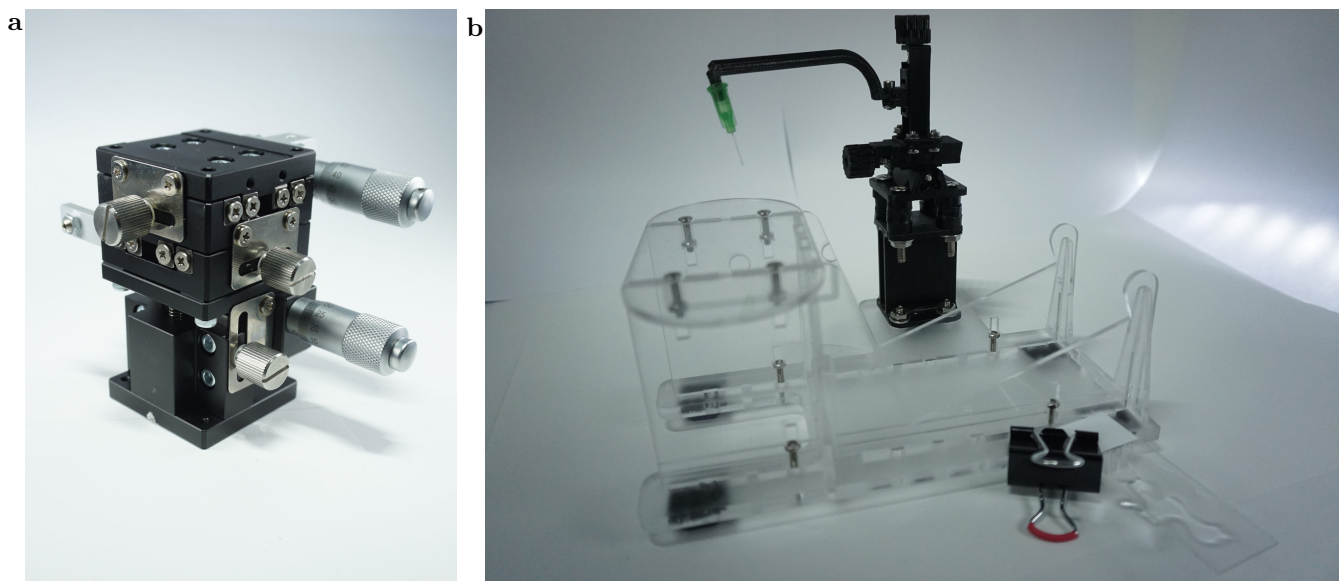

**Figure S4. Micromanipulators:** a: LD40-LM micromanipulator from overseas distributor. b: Arm rest with fixture to hold the Chiller at the ideal angle, cut from acrylic. A glass slide for holding a few drops of glue is in the foreground and the 3D-printed micromanipulator in the background.



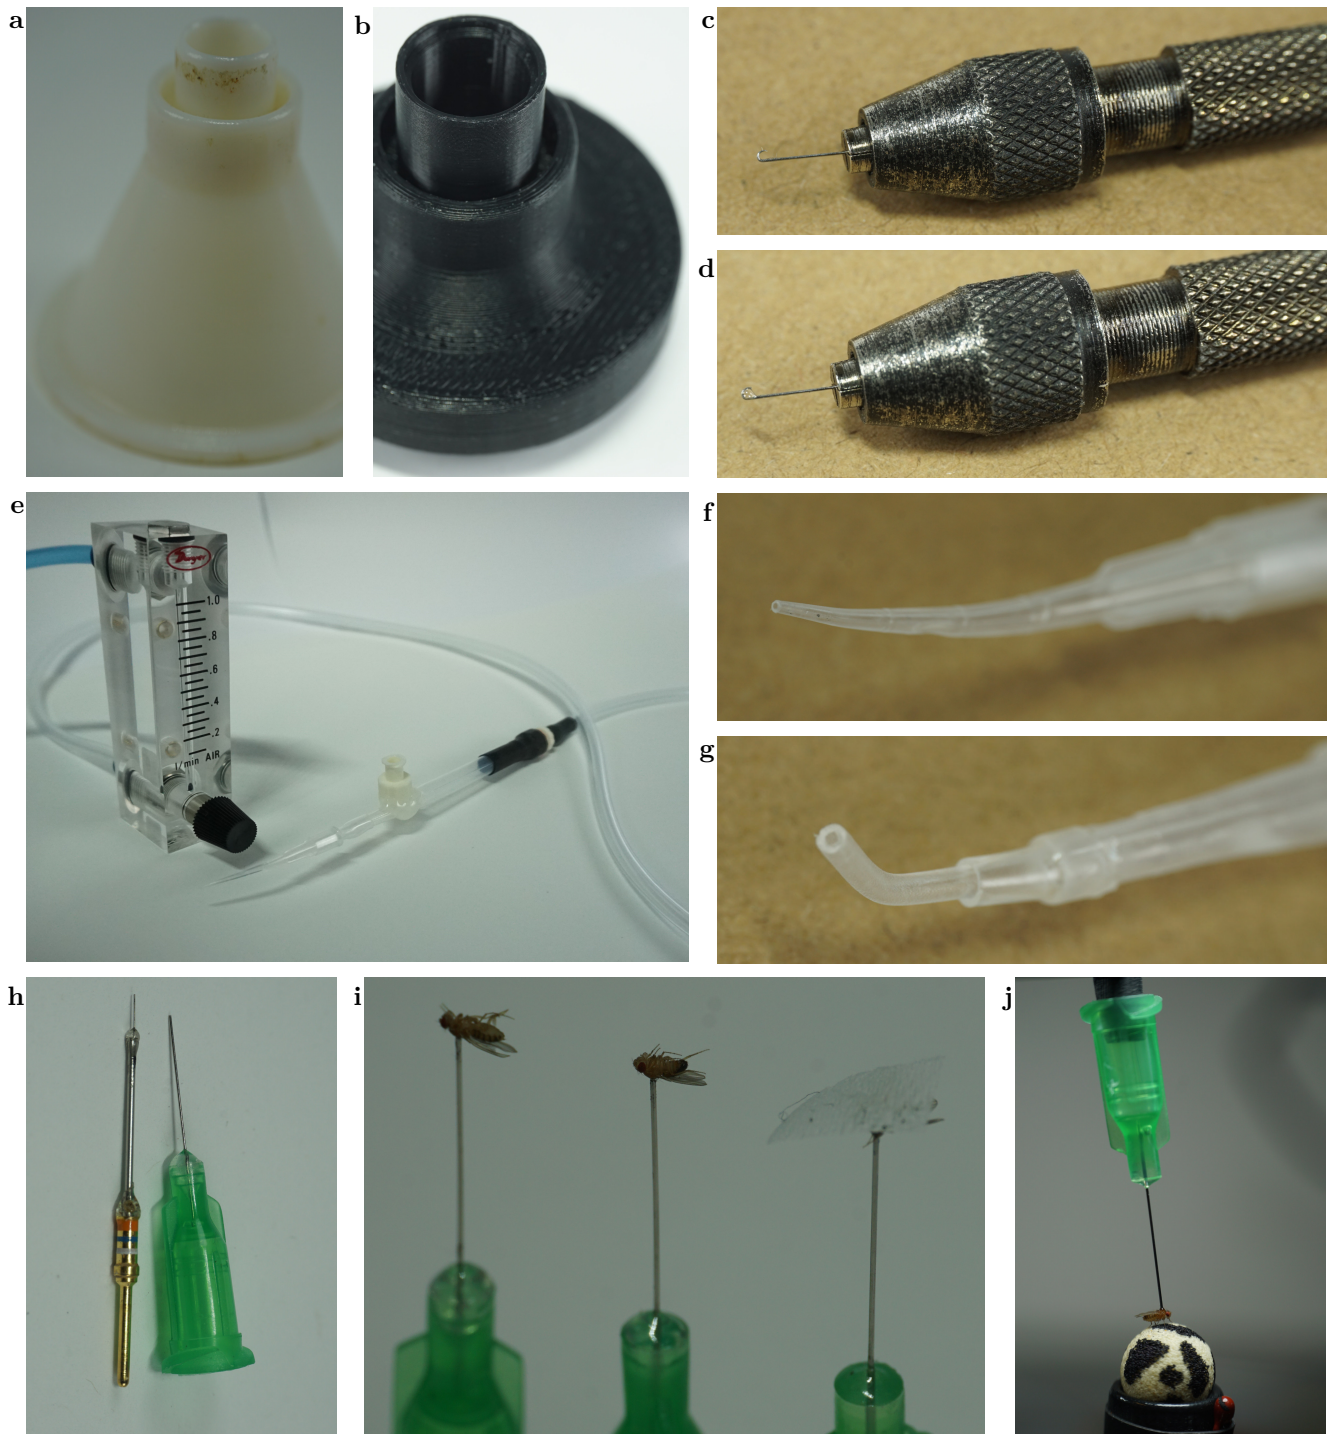

**Figure S5. Gallery of useful tools:** a, b: 3D-printed funnels used to move flies between bottles and vials. A bent minuten pin used to move the fly in the *Sarcophagus* and apply glue, without glue c and d with glue. e Flowmeter to regulate negative pressure for the fly picker. Tip of the fly picker made from micropipette tip (f) and shrink tube (g). h Traditionally made tether (left) and blunt dispensing tip with Luer lock alternative (right). i tethered flies in holding area prior to experiments, the 3rd holding a piece of tissue. j Body-fixed, tethered fly on a ball, showing the modest ‘uphill’ orientation of the fly

## **2 TABLES.**

Table S1 Components used in the tethering station for the inexpensive treadmill. The exact links and prices may vary, but with the product number (PN) and description, other vendors and similar products can be found.

| part                  | description                     | link                                                                                                                                                                                                                                                      | PN           | price  |
|-----------------------|---------------------------------|-----------------------------------------------------------------------------------------------------------------------------------------------------------------------------------------------------------------------------------------------------------|--------------|--------|
| microscope            | various; any dissecting scope   |                                                                                                                                                                                                                                                           |              |        |
| glue                  | glass to glass adhesive         | <a href="http://www.kemxert.com/product-catalog.cfm?pg=product-catalog&amp;prd_pct_id=2">http://www.kemxert.com/product-catalog.cfm?pg=product-catalog&amp;prd_pct_id=2</a>                                                                               | KOA-300      | \$3    |
| UV protective glasses | many                            |                                                                                                                                                                                                                                                           |              | \$30   |
| Fly picker wand       | Transfer Pipette                | <a href="https://amazon.com/dp/B07RFFMKBM">https://amazon.com/dp/B07RFFMKBM</a>                                                                                                                                                                           |              | \$0.03 |
| Temperature control   | Chiller peltier thermostat      | <a href="https://amazon.com/dp/B07VDRGK9F">https://amazon.com/dp/B07VDRGK9F</a>                                                                                                                                                                           | XH-W1209     | \$5    |
| Tether                | Blunt tip dispensing needle 34G | <a href="https://www.bstean.com/product/industrial-unsterilized-blunt-tip-dispensing-needle-with-luer-lock-34-ga-x-1-2-50-pcs/">https://www.bstean.com/product/industrial-unsterilized-blunt-tip-dispensing-needle-with-luer-lock-34-ga-x-1-2-50-pcs/</a> | AG-ABSS-99D0 | \$1.6  |
| Funnel                | 3D printed (PLA, ABS)           | <a href="https://reiserlab.github.io/Component-Designs/tether/funnels">https://reiserlab.github.io/Component-Designs/tether/funnels</a>                                                                                                                   |              | \$3    |
| Micro Manipulator     | 3D printed (ABS)                | <a href="https://reiserlab.github.io/Component-Designs/tether/micromanipulator">https://reiserlab.github.io/Component-Designs/tether/micromanipulator</a>                                                                                                 |              | \$20   |
| Screw                 | M3x0.5 40mm                     | <a href="https://www.mcmaster.com/91287A028/">https://www.mcmaster.com/91287A028/</a>                                                                                                                                                                     | 91287A028    | \$0.49 |
| Locking nuts          | M3x0.5                          | <a href="https://www.mcmaster.com/90576A102/">https://www.mcmaster.com/90576A102/</a>                                                                                                                                                                     | 90576A102    | \$0.11 |
| Nuts                  | M3x0.5                          | <a href="https://www.mcmaster.com/90592A085/">https://www.mcmaster.com/90592A085/</a>                                                                                                                                                                     | 90592A085    | \$0.06 |
| Washer                | M3                              | <a href="https://www.mcmaster.com/95610A530/">https://www.mcmaster.com/95610A530/</a>                                                                                                                                                                     | 95610A530    | \$0.23 |
| Heat pump             | Peltier element on heat sink    | <a href="https://www.adafruit.com/product/1335">https://www.adafruit.com/product/1335</a>                                                                                                                                                                 | 1335         | \$35   |

*Continued on next page*

Table S1 Components used in the tethering station for the inexpensive treadmill. The exact links and prices may vary, but with the product number (PN) and description, other vendors and similar products can be found.

| part                   | description         | link                                                                                                                                            | PN      | price  |
|------------------------|---------------------|-------------------------------------------------------------------------------------------------------------------------------------------------|---------|--------|
| Heat pump power supply | 12V 5A              | <a href="https://www.adafruit.com/product/352">https://www.adafruit.com/product/352</a>                                                         | 352     | \$25   |
| Sarcophagus            | 3D printed (ABS)    | <a href="https://reiserlab.github.io/Component-Designs/tether/sarcophagus">https://reiserlab.github.io/Component-Designs/tether/sarcophagus</a> |         | \$3    |
| Tether Station holder  | Laser cut (acrylic) | <a href="https://reiserlab.github.io/Component-Designs/tether/station">https://reiserlab.github.io/Component-Designs/tether/station</a>         |         | \$15   |
| UV Curing light        | UV Keychain light   | <a href="https://amazon.com/dp/B086PW9DBH">https://amazon.com/dp/B086PW9DBH</a>                                                                 |         | \$1.33 |
| Paintbrush             | NA                  | <a href="https://amazon.com/dp/B0878MN2VR">https://amazon.com/dp/B0878MN2VR</a>                                                                 |         | \$7    |
| Round bottom tube      | Chilling tube       | <a href="https://www.mcmaster.com/7012A54/">https://www.mcmaster.com/7012A54/</a>                                                               | 7012A54 | \$0.06 |
| Heat sink holder       | Hand rest           | <a href="https://www.ponoko.com/materials/anti-static-acrylic">https://www.ponoko.com/materials/anti-static-acrylic</a>                         |         | \$18   |
| Hollow Body Pin Vise   | Flyhook holder      | <a href="https://www.mcmaster.com/8455A18/">https://www.mcmaster.com/8455A18/</a>                                                               | 8455A18 | \$16   |

Table S2 Components used in the inexpensive treadmill experimental setup. The exact links and prices may vary, but with the product number (PN) and description, other vendors and similar products can be found. Some parts are listed as alternatives, for example the commercially available LD40-LM micromanipulator and the 3D-printed one.

| part      | description              | link                                                                                                            | PN      | price |
|-----------|--------------------------|-----------------------------------------------------------------------------------------------------------------|---------|-------|
| sphere    | milled or filed          | <a href="https://www.generalplastics.com/products/fr-7100">https://www.generalplastics.com/products/fr-7100</a> | FR-7110 |       |
| Display   | Amazon Fire Tablet       | <a href="https://amazon.com/dp/B07FKR6KXF">https://amazon.com/dp/B07FKR6KXF</a>                                 | KFMUWI  | \$50  |
| Baseplate | Acrylic Material only    | <a href="https://www.mcmaster.com/4615T37">https://www.mcmaster.com/4615T37</a>                                 | 4615T37 | \$13  |
| Baseplate | 5.5mm acrylic with holes | <a href="https://www.ponoko.com/materials/black-acrylic">https://www.ponoko.com/materials/black-acrylic</a>     |         | \$27  |

*Continued on next page*

Table S2 Components used in the inexpensive treadmill experimental setup. The exact links and prices may vary, but with the product number (PN) and description, other vendors and similar products can be found. Some parts are listed as alternatives, for example the commercially available LD40-LM micromanipulator and the 3D-printed one.

| part                | description          | link                                                                                                                                                            | PN        | price  |
|---------------------|----------------------|-----------------------------------------------------------------------------------------------------------------------------------------------------------------|-----------|--------|
| Micro Manipulator   | XYZ micromanipulator | <a href="https://www.aliexpress.com/item/33013923564.html">https://www.aliexpress.com/item/33013923564.html</a>                                                 | LD40-LM   | \$80   |
| Flow meter          | Dwyer Flowmeter      | <a href="https://www.dwyer-inst.com/Product/Flow/Flowmeters/VariableArea/SeriesVF">https://www.dwyer-inst.com/Product/Flow/Flowmeters/VariableArea/SeriesVF</a> | VFA-23    | \$40   |
| Temperature control | Heatpad thermostat   | <a href="https://amazon.com/dp/B07VDRGK9F">https://amazon.com/dp/B07VDRGK9F</a>                                                                                 | XH-W1209  | \$5    |
| Camera              | PS3 Eye              | <a href="https://ebay.us/8Gwt0X">https://ebay.us/8Gwt0X</a>                                                                                                     | 7010571   | \$15   |
| Micro Manipulator   | 3D printed (ABS)     | <a href="https://reiserlab.github.io/Component-Designs/tether/micromanipulator">https://reiserlab.github.io/Component-Designs/tether/micromanipulator</a>       |           | \$20   |
| Screw               | M3x0.5 40mm          | <a href="https://www.mcmaster.com/91287A028/">https://www.mcmaster.com/91287A028/</a>                                                                           | 91287A028 | \$0.49 |
| Locking nuts        | M3x0.5               | <a href="https://www.mcmaster.com/90576A102/">https://www.mcmaster.com/90576A102/</a>                                                                           | 90576A102 | \$0.11 |
| Nuts                | M3x0.5               | <a href="https://www.mcmaster.com/90592A085/">https://www.mcmaster.com/90592A085/</a>                                                                           | 90592A085 | \$0.06 |
| Washer              | M3                   | <a href="https://www.mcmaster.com/95610A530/">https://www.mcmaster.com/95610A530/</a>                                                                           | 95610A530 | \$0.23 |
| Sphere holder       | 3D printed (ABS)     | <a href="https://github.com/reiserlab/Component-Design">https://github.com/reiserlab/Component-Design</a>                                                       |           | \$6    |
| Sphere holder post  | 3D printed (ABS)     | <a href="https://reiserlab.github.io/Component-Designs/walking/sphere-holder">https://reiserlab.github.io/Component-Designs/walking/sphere-holder</a>           |           | \$5    |
| Lamp post and shade | 3D printed (ABS)     | <a href="https://reiserlab.github.io/Component-Designs/walking/illumination">https://reiserlab.github.io/Component-Designs/walking/illumination</a>             |           | \$15   |

*Continued on next page*

Table S2 Components used in the inexpensive treadmill experimental setup. The exact links and prices may vary, but with the product number (PN) and description, other vendors and similar products can be found. Some parts are listed as alternatives, for example the commercially available LD40-LM micromanipulator and the 3D-printed one.

| part         | description         | link                                                                                                                            | PN    | price |
|--------------|---------------------|---------------------------------------------------------------------------------------------------------------------------------|-------|-------|
| IR LED       | 940nm 5mm LED       | <a href="https://www.digikey.com/short/5hnfw5bq">https://www.digikey.com/short/5hnfw5bq</a>                                     | IR204 | \$0.9 |
| Power supply | Any 5V power source | <a href="https://www.adafruit.com/product/276">https://www.adafruit.com/product/276</a>                                         | 276   | \$8   |
| Tube Clamp   | Keck Roller Clamp   | <a href="https://www.usplastic.com/catalog/item.aspx?itemid=31260">https://www.usplastic.com/catalog/item.aspx?itemid=31260</a> | 16004 | \$5   |

Table S3 Examples for components used in typical preparatory setups.

| part                | description                             | link                                                                                                                                                                                                  | PN             | price  |
|---------------------|-----------------------------------------|-------------------------------------------------------------------------------------------------------------------------------------------------------------------------------------------------------|----------------|--------|
| Fly picker wand     | vacuum wand body                        | <a href="https://stores.netmotionstore.com/c001/">https://stores.netmotionstore.com/c001/</a>                                                                                                         | C001           | \$197  |
| Fly picker tip      | vacuum wand nozzle                      | <a href="https://stores.netmotionstore.com/2603/">https://stores.netmotionstore.com/2603/</a>                                                                                                         | 2603           | \$28   |
| Fly picker vacuum   | vacuum pump                             | <a href="https://stores.netmotionstore.com/fv10110/">https://stores.netmotionstore.com/fv10110/</a>                                                                                                   | FV10110        | \$178  |
| sarcophagus         | custom machined from brass              | <a href="https://reiserlab.github.io/Component-Designs/tether/sarcophagus#machined-brass-sarcophagus">https://reiserlab.github.io/Component-Designs/tether/sarcophagus#machined-brass-sarcophagus</a> | JF-MR-FS0006/7 | \$600  |
| cooling plate       | TECA liquid cooled thermoelectric plate | <a href="https://www.thermoelectric.com/cold-plates/general-use-liquid-cooled/lhp-300cp-series/">https://www.thermoelectric.com/cold-plates/general-use-liquid-cooled/lhp-300cp-series/</a>           | LHP-300CP      | \$600  |
| Temperature control | Benchtop temp. controller               | <a href="https://www.ovenind.com/product/5r6-900/">https://www.ovenind.com/product/5r6-900/</a>                                                                                                       | 5R6-900        | \$1135 |

*Continued on next page*

Table S3 Examples for components used in typical preparatory setups.

| part            | description                                | link                                                                                                                                                                                                                                                                                                | PN       | price  |
|-----------------|--------------------------------------------|-----------------------------------------------------------------------------------------------------------------------------------------------------------------------------------------------------------------------------------------------------------------------------------------------------|----------|--------|
| water cooler    | thermoelectric recirculating chiller       | <a href="https://www.thermotekusa.com/product.php?pid=108">https://www.thermotekusa.com/product.php?pid=108</a>                                                                                                                                                                                     | T257P    | \$3470 |
| microscope      | various; any dissecting scope              |                                                                                                                                                                                                                                                                                                     |          |        |
| breadboard base | Aluminum 10" x 12"                         | <a href="https://www.thorlabs.com/thorproduct.cfm?partnumber=MB1012">https://www.thorlabs.com/thorproduct.cfm?partnumber=MB1012</a>                                                                                                                                                                 | MB1012   | \$139  |
| manipulator     | 4 axis manipulator                         | <a href="https://www.siskiyou.com/mx1601-14650000e.html">https://www.siskiyou.com/mx1601-14650000e.html</a>                                                                                                                                                                                         | MX160L   | \$1500 |
| tether adapter  | connector (gold plated)                    | <a href="https://www.digikey.com/en/products/detail/te-connectivity-aerospace-defense-and-marine/205089-1/132229">https://www.digikey.com/en/products/detail/te-connectivity-aerospace-defense-and-marine/205089-1/132229</a>                                                                       | A2160-ND | \$0.4  |
| tether          | 4 inch long, 0.005" diameter, tungsten rod | <a href="https://www.a-msystems.com/p-728-tungsten-rod.aspx">https://www.a-msystems.com/p-728-tungsten-rod.aspx</a>                                                                                                                                                                                 | 716100   | \$0.08 |
| tether shaft    | Hypodermic tubing, 304-TW 23 GA            | ?                                                                                                                                                                                                                                                                                                   |          | \$0.15 |
| tether mount    | brass rod + pin socket                     | <a href="https://www.digikey.com/en/products/detail/te-connectivity-aerospace-defense-and-marine/205090-1/132232?s=N4IgTCBcDaIIJgIwDZEFoByAREBdAvkA">https://www.digikey.com/en/products/detail/te-connectivity-aerospace-defense-and-marine/205090-1/132232?s=N4IgTCBcDaIIJgIwDZEFoByAREBdAvkA</a> | A2161-ND | \$1    |
| glue            | glass to glass adhesive                    | <a href="http://www.kemxert.com/product-catalog.cfm?pg=product-catalog&amp;prd_pct_id=2">http://www.kemxert.com/product-catalog.cfm?pg=product-catalog&amp;prd_pct_id=2</a>                                                                                                                         | KOA-300  | \$3    |
| UV curing light | UV curing system, 365 nm                   | <a href="https://www.thorlabs.com/thorproduct.cfm?partnumber=CS20K2">https://www.thorlabs.com/thorproduct.cfm?partnumber=CS20K2</a>                                                                                                                                                                 | CS20K2   | \$2400 |

*Continued on next page*

Table S3 Examples for components used in typical preparatory setups.

| part                  | description           | link                                                                                                                                    | PN      | price  |
|-----------------------|-----------------------|-----------------------------------------------------------------------------------------------------------------------------------------|---------|--------|
| UV protective glasses | many                  |                                                                                                                                         |         | \$30   |
| Funnel                | 3D printed (PLA, ABS) | <a href="https://reiserlab.github.io/Component-Designs/tether/funnels">https://reiserlab.github.io/Component-Designs/tether/funnels</a> |         | \$3    |
| Paintbrush            | NA                    | <a href="https://amazon.com/dp/B0878MN2VR">https://amazon.com/dp/B0878MN2VR</a>                                                         |         | \$7    |
| Round bottom tube     | Chilling tube         | <a href="https://www.mcmaster.com/7012A54/">https://www.mcmaster.com/7012A54/</a>                                                       | 7012A54 | \$0.06 |
| Hollow Body Pin Vise  | Flyhook holder        | <a href="https://www.mcmaster.com/8455A18/">https://www.mcmaster.com/8455A18/</a>                                                       | 8455A18 | \$16   |

Table S4 Examples for components used in typical experimental setups.

| part                 | description                                              | link                                                                                                                                                                                                                                              | PN                 | price  |
|----------------------|----------------------------------------------------------|---------------------------------------------------------------------------------------------------------------------------------------------------------------------------------------------------------------------------------------------------|--------------------|--------|
| Micro Manipulator    | miniature 4-axis micromanipulator, rotatable probe clamp | <a href="https://www.siskiyou.com/mx10-series-manipulator.html">https://www.siskiyou.com/mx10-series-manipulator.html</a>                                                                                                                         | MX10R              | \$575  |
| tether mount         | same as above – brass rod + pin socket                   |                                                                                                                                                                                                                                                   |                    | \$10   |
| sphere               | milled or filed                                          | <a href="https://www.generalplastics.com/products/fr-7100">https://www.generalplastics.com/products/fr-7100</a>                                                                                                                                   | FR-7110            |        |
| sphere holder        | custom machined                                          |                                                                                                                                                                                                                                                   |                    | \$400  |
| mass flow controller | digital MFC                                              | <a href="https://www.sierrainstruments.com/products/50series.html">https://www.sierrainstruments.com/products/50series.html</a>                                                                                                                   | SmartTrak 50       | \$1600 |
| camera               | Basler Ace USB3 camera, any with low res, hi FPS         | <a href="https://www.baslerweb.com/en/products/cameras/area-scan-cameras/ace/#framerate=100;monocolor=mono;interface=usb30">https://www.baslerweb.com/en/products/cameras/area-scan-cameras/ace/#framerate=100;monocolor=mono;interface=usb30</a> | Ace U acA640-750um | \$402  |

*Continued on next page*



Table S4 Examples for components used in typical experimental setups.

| part                 | description                                  | link                                                                                                                                                                                                | PN              | price  |
|----------------------|----------------------------------------------|-----------------------------------------------------------------------------------------------------------------------------------------------------------------------------------------------------|-----------------|--------|
| lens                 | Computar Macro Zoom lens                     | <a href="https://computar.com/product/559/MLM3X-MP">https://computar.com/product/559/MLM3X-MP</a>                                                                                                   | MLM3X-MP        | \$625  |
| illumination         | 2 LED plus a controller (FlyFizz suggestion) | <a href="https://wiki.janelia.org/wiki/display/flyfizz/Fly-on-a-ball#Fly-on-a-ball-Hardwareassembly">https://wiki.janelia.org/wiki/display/flyfizz/Fly-on-a-ball#Fly-on-a-ball-Hardwareassembly</a> |                 | \$385  |
| temperature control  | thermostat and small heater                  |                                                                                                                                                                                                     |                 | \$80   |
| display 1            | G3 system                                    |                                                                                                                                                                                                     |                 | \$2200 |
| display 2            | Projector options                            | <a href="https://www.ti.com/tool/DLPDLCR2010EVM">https://www.ti.com/tool/DLPDLCR2010EVM</a>                                                                                                         | DLPDLCR2010-EVM | \$499  |
| breadboard base      | Aluminum 10" x 12"                           | <a href="https://www.thorlabs.com/thorproduct.cfm?partnumber=MB1012">https://www.thorlabs.com/thorproduct.cfm?partnumber=MB1012</a>                                                                 | MB1012          | \$139  |
| other thorlabs parts | rails, posts, rail carriers, etc.            |                                                                                                                                                                                                     |                 | \$200  |
